25

## Abstract

26 Gillnets made of the biodegradable resin polybutylene succinate co-adipate-co-terephthalate  
27 (PBSAT) were tested under commercial fishing conditions to compare their fishing performance  
28 with that of conventional nylon polyamide (PA) gillnets. Both types of gillnets were made of 0.55  
29 mm Ø monofilaments. However, since the biodegradable nets are weaker than nylon PA nets when  
30 using the same monofilament diameter, we also used biodegradable nets made of 0.60 mm Ø  
31 monofilament that had a similar tensile strength to the 0.55 mm Ø nylon PA nets. The relative catch  
32 efficiency of the different gillnet types was evaluated over the 2018 autumn fishing season for saithe  
33 and cod in northern Norway. For cod, both biodegradable gillnets (0.55 and 0.60 mm) had a  
34 significantly lower catch efficiency compared to the traditional nylon PA net (0.55 mm) with  
35 estimated catch efficiencies of 62.38% (CI: 50.55–74.04) and 54.96% (CI: 35.42–73.52) compared  
36 with the nylon PA net, respectively. Similarly for saithe, both biodegradable gillnets (0.55 and 0.60  
37 mm) had a lower estimated catch efficiency compared to the traditional nylon PA net (0.55 mm)  
38 with estimated catch efficiencies of 83.40% (71.34–94.86) and 83.87% (66.36–104.92), compared  
39 with the nylon PA net, respectively. Tensile strength does not explain the differences in catch  
40 efficiency between the two gillnet types, since increasing the twine diameter of the biodegradable  
41 gillnets (to match the strength of nylon PA gillnets) did not yield similar catch efficiencies.  
42 However, the elasticity and stiffness of the materials may be responsible for the differences in catch  
43 efficiency between the nylon PA and biodegradable gillnets.

44

45 *Keywords:* Biodegradable gillnet; Ghost fishing; Catch efficiency; Tensile strength; Elasticity; Cod;  
46 Saithe.

47

48

## 49 **Introduction**

50 Globally, gillnets are among the most commonly used fishing gears in developing and industrialized  
51 countries [1]. In Norway, 26% and 16% of the total national allowable quota for Northeast Atlantic  
52 cod (*Gadus morhua*) and saithe (*Pollachius virens*), which in 2019 was 385.000 and 203.368 tonnes  
53 respectively, were caught with gillnets [2]. The Norwegian coastal fleet (with vessels shorter than  
54 28 m) is responsible for approximately 99% of the gillnet landing of Northeast Atlantic cod. In 2019,  
55 the coastal fleet consisted of 5978 vessels, with 81% of them being smaller than 14.9 m [3]. Despite  
56 the importance of the gillnet fishery, large numbers of gillnets are lost every year, causing  
57 environmental problems such as ghost fishing and marine litter. Deshpande et al. [4] provided  
58 annual loss rates of the six types of fishing gears used in Norwegian waters upon deployment, and  
59 gillnets were the primary source of derelict gear. Although fisheries authorities lack a complete  
60 overview of the amount of lost or derelict gillnets, estimates from the Norwegian Environment  
61 Agency [5] suggest that 13,941 gillnets are lost each year.

62  
63 The impacts of derelict gillnets include continued catching of target and non-target species  
64 (commonly known as ghost fishing), alterations to the benthic environment, marine plastic  
65 pollution, navigational hazards, beach debris/litter, introduction of synthetic material into the marine  
66 food web, costs related to clean-up operations, and impacts on business activities [6]. The impact of  
67 derelict gillnets on the environment has been exacerbated by the introduction of non-biodegradable  
68 materials, primarily plastics, which are generally more persistent in the environment than natural  
69 materials. With reference to the principles for fisheries resource management (the Gordon-Schaefer  
70 model) [7], ghost fishing also represents an unregistered amount of fishing mortality, which  
71 undermines the use of the population analysis models for maximum sustainable yield management  
72 and the ecosystem management approach. There have been extensive efforts to assess the magnitude  
73 of derelict gillnets [8, 9], and in the last decade many studies have focussed on developing methods

74 to reduce the effects of derelict gear. Some specific measures to address the problem include gear  
75 marking, onshore collection/reception and/or payment for old/retrieved gear, reduced fishing effort,  
76 use of biodegradable nets, and gear recovery programs for gear disposal and recycling [9].

77

78 Norway is one of the countries that has a program to systematically retrieve lost gears from areas  
79 with the highest fishing intensity. Between 1983 and 2017, the Norwegian Directorate of Fisheries  
80 retrieved 20,450 lost gillnets and a large amount of other fishing gear (e.g., ropes, pots, trawls),  
81 which contained variable amounts of marine resources that had been caught in the lost gear (ghost  
82 fishing). In 2017, just 815 of the 13,941 gillnets that were reported lost were retrieved [5, 10]. Due  
83 to the low recovery rate of lost fishing gears and the low on-land disposal rate of plastics from the  
84 fishing industry, recent research has focused on developing biodegradable plastic materials for  
85 fishing gear, i.e. gillnets, to try to reduce the negative effects of derelict fishing gear.

86

87 Biodegradable plastic is a plastic that maintains the same properties as a conventional plastic during  
88 use, but that can be completely degraded by naturally occurring microorganisms such as bacteria,  
89 fungi, and algae when disposed of in the environment [11]. The most investigated biodegradable  
90 plastics in fishing equipment and marine applications, i.e., aquaculture, are polybutylene succinate  
91 (PBS), polybutylene adipate co-terephthalate (PBAT), and polybutylene succinate co-adipate-co-  
92 terephthalate (PBSAT) [12-20]. Commercial fishing products made of these materials are available  
93 in some countries, such as South Korea. Other biodegradable plastics of interest include polylactic  
94 acid (PLA), polycaprolactone (PCL), polybutylene succinate adipate (PBSA),  
95 polyhydroxyalkanoates (PHAs) (e.g., poly(3-hydroxybutyrate) [P(3HB)] and poly(3-  
96 hydroxybutyrate-co-3-hydroxyvalerate) [P(3HB-co-3HV)], and combinations of PHAs. Various  
97 microorganisms are known to degrade biodegradable plastics at different rates, for example, the  
98 microorganisms present in the Arctic have a high capacity for biodegradation [21]. Additionally,

99 there are reports that the degradation of PCL and PHB/V fibres occurs at a faster rate than that of  
100 PBS fibres in deep seawater [22]. However, PBSA may be degraded by several microorganism types  
101 compared to PBS [21]. Biodegradable fishing nets have thermal, mechanical, and physical  
102 properties that are comparable to those of traditional products made of nylon polyamide (PA),  
103 polyester (PES), polyethylene (PE), and polypropylene (PP) [12, 13, 17].

104  
105 Biodegradable fishing gears have been studied in South Korea and Norway as an alternative to  
106 reduce the negative impact of derelict gear on the marine environment. In South Korea, these gears  
107 have been tested in 13 different fisheries, including gillnetting and potting for roundfish, flatfish,  
108 shrimps, octopus, crabs, and eels [12-17, 23-25]. The results showed that in some cases the fishing  
109 efficiency of these gears is similar to that of gears made of PA, PE, and PP. In Norway,  
110 biodegradable gillnets have shown a consistently lower catch efficiency than nylon PA gillnets, and  
111 this difference has been mainly attributed to the fact that biodegradable gillnets are made with 11-  
112 16% weaker monofilaments than nylon PA monofilaments of the same diameter [18-20, 26]. The  
113 aim of the present study is to assess the effect of twine thickness tensile strength on the catch  
114 efficiency of biodegradable gillnets. Our main hypothesis is that by increasing the monofilament  
115 diameter of the biodegradable gillnets, to match the tensile strength of nylon PA monofilaments, the  
116 catch efficiency of the biodegradable gillnets will be improved and yield a similar catch efficiency  
117 to nylon PA gillnets. We designed the fishing experiments to answer the following research  
118 questions:

- 119 i. Can biodegradable and nylon PA gillnets made of monofilaments with similar tensile  
120 strength (although different monofilament diameter) yield similar catch efficiencies?
- 121 ii. Is tensile strength the mechanical property responsible for the difference in catch efficiency  
122 between biodegradable and nylon PA gillnets?
- 123 iii. Is catch efficiency positively or negatively correlated to monofilament diameter in

124 biodegradable gillnets?

125

## 126 **Materials and methods**

### 127 **Ethics Statement**

128 This study did not involve endangered or protected species. Experimental fishing was conducted  
129 on board a commercial fishing vessel and no permit was required to conduct the study on board.  
130 No information on animal welfare, or on steps taken to mitigate fish suffering and methods of  
131 sacrifice is provided, since the animals were not exposed to any additional stress other than that  
132 involved in commercial fishing practices.

### 133 **Experimental setup**

134 Sea trials were conducted on board the coastal gillnet vessel "MS Karoline" (10.9 m total length)  
135 throughout October and December 2018. The fishing grounds chosen for the sea trials were located  
136 off the coast of Troms (Northern Norway) between 70°21'–70°22'N and 19°39'–19°42'E, which is  
137 a common fishing area for coastal vessels from Troms targetting cod and saithe.

138

139 A 130 mm nominal mesh opening was used for both types of gillnets, with monofilament twine  
140 thickness of 0.55 and 0.60 mm in the biodegradable gillnets and 0.55 mm in the nylon PA gillnets.  
141 Since the biodegradable monofilament is considered to be approximately 10% weaker than nylon  
142 PA monofilament (at equal monofilament thickness), the monofilament thickness was increased  
143 from 0.55mm to 0.60 mm to compensate for the difference in tensile strength.

144

145 Two sets of gillnets were used in the experiments. Each set consisted of 16 gillnets, with eight  
146 biodegradable gillnets (B) and eight nylon PA gillnets (N). The gillnets were arranged in such a way

147 that they provided information for paired comparison, nylon PA versus biodegradable gillnet,  
148 accounting for spatial and temporal variation in the availability of cod. With individual sets being  
149 the basic unit for the paired analysis [19], it was important that the biodegradable and nylon PA  
150 gillnets were approximately exposed to the same spatial variability in cod availability within each  
151 gillnet set. This could in principle be achieved by alternating between the two types of nets after  
152 each net sheet as follows: B-N-B-N-B-N-B-N-B-N-B-N-B-N-B-N. However, for ease of on board  
153 recording of fish in relation to the type of net in which it was caught, the alternation in net types was  
154 only applied after every second net sheet. Therefore, to make conditions as equal as possible  
155 between net types, set 1 was arranged as N-BB-NN-BB-NN-BB-NN-BB-N and set 2 as B-NN-BB-  
156 NN-BB-NN-BB-NN-B. Actual measurements of the mesh openings (four rows of 20 meshes each)  
157 were taken with a Vernier calliper without applying tension to the meshes, which showed that the  
158 mean mesh openings of 0.55mm nylon PA gillnets and 0.55mm and 0.60mm biodegradable gillnets  
159 were  $131.6 \pm 0.72$  mm,  $131.5 \pm 1.0$  mm and  $132.5 \pm 0.8$  mm, respectively.

## 160 **Data analysis**

### 161 **Modelling catch efficiency**

162 We used the statistical analysis software SELNET [27, 28] to analyze the catch data and conduct  
163 length-dependent catch comparison and catch ratio analyses. Using the catch information (numbers  
164 and sizes of cod or saithe in each gillnet set deployment), we wanted to determine whether there  
165 was a significant difference in the catch efficiency averaged over deployments between the nylon  
166 PA gillnet and the biodegradable gillnet. We also wanted to determine if a potential difference  
167 between the gillnet types could be related to the size of the cod or saithe. The analysis was conducted  
168 separately for each species (cod and saithe) and each biodegradable gillnet (0.55 mm and 0.60 mm)  
169 following the procedure described below.

170

171 To assess the relative length-dependent catch efficiency effect of changing from nylon PA gillnet  
172 to a biodegradable gillnet, we used the method described in [29] and compared the catch data for  
173 the two net types. This method models the length-dependent catch comparison rate ( $CC_l$ ) summed  
174 over gillnet set deployments (for the full deployment period):

$$175 \quad CC_l = \frac{\sum_{j=1}^m \{nt_{lj}\}}{\sum_{j=1}^m \{nt_{lj} + nc_{lj}\}} \quad (1)$$

176 where  $nc_{lj}$  and  $nt_{lj}$  are the numbers of cod caught in each length class  $l$  for the nylon PA gillnet  
177 (control) and the biodegradable gillnet (treatment) in deployment  $j$  of a gillnet set (first or second  
178 set).  $m$  is the number of deployments carried out with one of the two sets. The functional form for  
179 the catch comparison rate  $CC(l, \mathbf{v})$  (the experimental being expressed by equation 1) was obtained  
180 using maximum likelihood estimation by minimizing the following expression:

$$181 \quad - \sum_l \left\{ \sum_{j=1}^m \{nt_{lj} \times \ln(CC(l, \mathbf{v})) + nc_{lj} \times \ln(1.0 - CC(l, \mathbf{v}))\} \right\} \quad (2)$$

182 where  $\mathbf{v}$  is a vector of the parameters describing the catch comparison curve defined by  $CC(l, \mathbf{v})$ . The  
183 outer summation in the equation is the summation over length classes  $l$ . When the catch efficiency  
184 of the biodegradable gillnet and nylon PA gillnet is similar, the expected value for the summed catch  
185 comparison rate would be 0.5. Therefore, this baseline can be applied to judge whether or not there  
186 is a difference in catch efficiency between the two gillnet types. The experimental  $CC_l$  was modelled  
187 by the function  $CC(l, \mathbf{v})$  using the following equation:

$$188 \quad CC(l, \mathbf{v}) = \frac{\exp(f(l, v_0, \dots, v_k))}{1 + \exp(f(l, v_0, \dots, v_k))} \quad (3)$$

189 where  $f$  is a polynomial of order  $k$  with coefficients  $v_0$  to  $v_k$ . The values of the parameters  $\mathbf{v}$  describing  
190  $CC(l, \mathbf{v})$  were estimated by minimizing equation (2), which was equivalent to maximizing the  
191 likelihood of the observed catch data. We considered  $f$  of up to an order of 4 with parameters  $v_0, v_1,$   
192  $v_2, v_3,$  and  $v_4$ . Leaving out one or more of the parameters  $v_0 \dots v_4$  led to 31 additional models that  
193 were also considered as potential models for the catch comparison  $CC(l, \mathbf{v})$ . Among these models,



194 estimations of the catch comparison rate were made using multi-model inference to obtain a  
195 combined model [29, 30].

196

197 The ability of the combined model to describe the experimental data was evaluated based on the p-  
198 value. The p-value, which was calculated based on the model deviance and the degrees of freedom,  
199 should not be  $< 0.05$  for the combined model to describe the experimental data sufficiently well,  
200 except for cases where the data are subject to over-dispersion [29, 31]. Based on the estimated catch  
201 comparison function  $CC(l, \nu)$  we obtained the relative catch efficiency (also named catch ratio)  
202  $CR(l, \nu)$  between the two gillnet types using the following relationship:

203 
$$CR(l, \nu) = \frac{CC(l, \nu)}{(1 - CC(l, \nu))} \quad (4)$$

204 The catch ratio is a value that represents the relationship between catch efficiency of the  
205 biodegradable gillnet and that of the nylon PA gillnet. Thus, if the catch efficiency of both gillnets  
206 is equal,  $CR(l, \nu)$  should always be 1.0.  $CR(l, \nu) = 1.5$  would mean that the biodegradable gillnet is  
207 catching 50% more cod of length  $l$  than the nylon PA gillnet. In contrast,  $CR(l, \nu) = 0.8$  would mean  
208 that the biodegradable gillnet is only catching 80% of the cod of length  $l$  that the nylon PA gillnet  
209 is catching.

210

211 The confidence limits for the catch comparison curve and catch ratio curve were estimated using a  
212 double bootstrapping method [29]. This bootstrapping method accounts for between-set variability  
213 (the uncertainty in the estimation resulting from set deployment variation of catch efficiency in the  
214 gillnets and in the availability of cod) as well as within-set variability (uncertainty about the size  
215 structure of the catch for the individual deployments). However, contrary to the double  
216 bootstrapping method [29], the outer bootstrapping loop in the current study, which accounts for  
217 between deployment variation, was performed as a paired analysis for the biodegradable gillnet and  
218 nylon PA gillnet, taking full advantage of the experimental design with both nets being deployed

219 simultaneously (see Fig. 1). By multi-model inference in each bootstrap iteration, the method also  
220 accounted for the uncertainty due to uncertainty in model selection. We performed 1,000 bootstrap  
221 repetitions and calculated the Efron 95% [32] confidence limits. To identify sizes of cod with  
222 significant differences in catch efficiency, we checked for length classes in which the 95%  
223 confidence limits for the catch ratio curve did not contain 1.0.

224

225 Finally, a length-integrated average value for the catch ratio was estimated directly from the  
226 experimental catch data using the following equation:

$$227 \quad CR_{average} = \frac{\sum_i \sum_{j=1}^m \{nt_{ij}\}}{\sum_i \sum_{j=1}^m \{nc_{ij}\}} \quad (5)$$

228 where the outer summation covers the length classes in the catch during the experimental fishing  
229 period.

230

### 231 **Assessing the catch ratio of the two biodegradable gillnet designs**

232 Because the same nylon gillnet design was used as a baseline in the assessment of the catch ratio  
233 curves for both the 0.55 and 0.60 mm biodegradable gillnet, it was possible to indirectly assess the  
234 catch ratio curve between the two biodegradable gillnets. This was performed by calculating the  
235 ratio between the catch ratio curves obtained from the two catch ratio curves against the nylon net  
236 using the following equation:

$$237 \quad CR(l, \mathbf{v})_{0.60/0.55} = \frac{CR(l, \mathbf{v})_{0.60}}{CR(l, \mathbf{v})_{0.55}} \quad (6)$$

238 The 95% confidence intervals for  $CR(l, \mathbf{v})_{0.60/0.55}$  were obtained based on the two the two bootstrap  
239 populations of results (1000 bootstrap repetitions in each) from each CR curve estimated for the  
240 0.55 and 0.60 mm biodegradable gillnets against the nylon net. Since both bootstrap populations  
241 were obtained independently and the sampling to obtain those populations of results was performed

242 randomly and independently, a new population of results with 1000 bootstrap iterations was created  
243 for  $CR(l,v)_{0.60/0.55}$  following [33, 34]:

$$244 \quad CR(l,v)_{0.60/0.55_i} = \frac{CR(l,v)_{0.60_i}}{CR(l,v)_{0.55_i}}, \quad i \in [1, \dots, 1000] \quad (7)$$

245 Where  $i$  represents the bootstrap repetition index. Based on this new population the Efron 95%  
246 confidence bands for  $CR(l,v)_{0.60/0.55}$  were obtained.

### 247 **Assessment of mechanical properties**

248 We estimated the mean tensile strength, elongation at break and the elasticity of the samples. Tensile  
249 strength, defined as the stress needed to break the sample, is given in kg. Elongation at break, defined  
250 as the length of the sample after it had stretched to the point when it breaks, is given as a percentage  
251 relative to the initial mesh size. Elasticity is a measurement of the resistance of an object or  
252 substance to being deformed elastically (stiffness) when a force is applied to it. The outputs from  
253 tensile testing were force-displacement curves which are described by the following equation:

$$254 \quad F = -k \times \Delta P \quad (8)$$

255 where  $\Delta P$  is the amount of deformation (displacement in mm) produced by the force  $F$ , and  $k$  is a  
256 proportionality constant that depends on the shape and composition of the object and the direction  
257 of the force. We estimated two elasticities from the slopes of the force-displacement curve in the  
258 elastic deformation region (Fig 1).

259

260 **Fig 1: Elasticity:** Estimation of  $E_1$  and  $E_2$  from force-displacement curve.

261

262 Force-elongation curves were obtained from tensile strength testing for all types of gillnets, new  
263 and used. For each replicate, the tensile strength was determined as the peak of the force-elongation  
264 curve, and the corresponding elongation was taken as the elongation at break. For a set of samples,

265 the tensile strength was determined as the average of all replicates, and polynomial fitting was  
266 performed to determine the average force-elongation curve.

267

268 Force-elongation curves of new and used gillnets from experiments carried out in 2017-2019 are  
269 presented and used in the discussion section to support the findings of this study.

## 270 **Results**

271 Sufficient data was collected for both cod and saithe throughout the trial period. A total of 1,200  
272 cod were caught, 780 using the nylon PA gillnet and 420 in the biodegradable gillnet (269 with the  
273 0.55 mm and 151 with the 0.60 mm nets). A total of 1,328 saithe individuals were collected, of  
274 these, 736 were caught in the nylon PA gillnets and the remaining 592 were caught in the  
275 biodegradable gillnet (403 with the 0.55 mm and 189 with the 0.60 mm nets). Data were collected  
276 for 21 gillnet deployments for both cod and saithe, but the analysis was conducted based on  
277 deployments that had at least 10 fish in each set (Table 1). This was done in order to reduce the  
278 potential for additional uncertainty in the results and has been used successfully in previous catch  
279 comparison studies [18, 19].

## 280 **Cod**

281 For cod, this resulted in a total of 15 sets for analysis from the 0.55 mm setup and 12 from the 0.60  
282 mm setup (Table 1). In the case of cod, both biodegradable gillnets (0.55 and 0.60 mm) had a  
283 significantly lower catch efficiency compared to the traditional nylon PA gillnet (0.55 mm) with  
284 estimated efficiencies of 62.38% (CI: 50.55–74.04) and 54.96% (CI: 35.42–73.52) compared with  
285 the nylon PA net, respectively (Tables 2 and Fig 2).

286

287

288

289 **Table 1: Catch data from all deployments for cod.** The rows highlighted in grey indicate sets used in the analysis (sets containing at least 10  
 290 cod). The setups with 55 mm nylon PA gillnets / 55 or 60 mm biodegradable gillnets are indicated by 55/55 and 55/60.  
 291

| Set | Setup | Setting date<br>(dd.mm.yyyy) | Fishing<br>time | Fishing<br>depth (m)<br>(min – max) | Acc. no.<br>of<br>deployments | No. of cod in<br>nylon PA<br>gillnets | No. of cod<br>in bio<br>gillnets | Min cod<br>length in nylon<br>PA gillnets | Max cod<br>length in nylon<br>PA gillnets | Min cod<br>length in<br>bio gillnets | Max cod<br>length in<br>bio gillnets |
|-----|-------|------------------------------|-----------------|-------------------------------------|-------------------------------|---------------------------------------|----------------------------------|-------------------------------------------|-------------------------------------------|--------------------------------------|--------------------------------------|
| 1   | 55/55 | 07.09.2018                   | 19h 45min       | 140                                 | 1                             | 1                                     | 1                                | 87                                        | 87                                        | 60                                   | 60                                   |
| 1   | 55/60 | 07.09.2018                   | 19h 45min       | 120                                 | 1                             | 0                                     | 0                                | 0                                         | 0                                         | 0                                    | 0                                    |
| 2   | 55/55 | 11.09.2018                   | 21h 45min       | 110                                 | 2                             | 3                                     | 1                                | 60                                        | 85                                        | 64                                   | 64                                   |
| 2   | 55/60 | 11.09.2018                   | 22h 10min       | 130                                 | 2                             | 2                                     | 3                                | 66                                        | 76                                        | 60                                   | 101                                  |
| 3   | 55/55 | 31.10.2018                   | 27h 30min       | 170–140                             | 3                             | 15                                    | 7                                | 51                                        | 88                                        | 50                                   | 73                                   |
| 3   | 55/60 | 31.10.2018                   | 26h 15min       | 130–110                             | 3                             | 1                                     | 2                                | 80                                        | 80                                        | 61                                   | 63                                   |
| 4   | 55/55 | 01.11.2018                   | 22h 40min       | 180–160                             | 4                             | 6                                     | 2                                | 59                                        | 69                                        | 60                                   | 64                                   |
| 4   | 55/60 | 01.11.2018                   | 24h 15min       | 110–130                             | 4                             | 1                                     | 2                                | 65                                        | 65                                        | 50                                   | 67                                   |
| 5   | 55/55 | 02.11.2018                   | 22h 40min       | 100–120                             | 5                             | 3                                     | 2                                | 63                                        | 73                                        | 65                                   | 68                                   |
| 5   | 55/60 | 02.11.2018                   | 23h 55min       | 105–125                             | 5                             | 2                                     | 2                                | 63                                        | 68                                        | 60                                   | 64                                   |
| 6   | 55/55 | 12.11.2018                   | 24h 50min       | 25–30                               | 6                             | 40                                    | 28                               | 60                                        | 88                                        | 59                                   | 84                                   |
| 6   | 55/60 | 12.11.2018                   | 24h 15min       | 50–70                               | 6                             | 6                                     | 3                                | 61                                        | 81                                        | 67                                   | 73                                   |
| 7   | 55/55 | 13.11.2018                   | 21h 20min       | 25–30                               | 7                             | 4                                     | 1                                | 56                                        | 66                                        | 78                                   | 78                                   |
| 7   | 55/60 | 13.11.2018                   | 21h 45min       | 50–70                               | 7                             | 4                                     | 0                                | 60                                        | 68                                        | 59                                   | 91                                   |
| 8   | 55/55 | 14.11.2018                   | 22h 00min       | 50–70                               | 8                             | 2                                     | 4                                | 59                                        | 69                                        | 60                                   | 90                                   |
| 8   | 55/60 | 14.11.2018                   | 18h 20min       | 50–70                               | 8                             | 1                                     | 3                                | 74                                        | 74                                        | 56                                   | 83                                   |
| 9   | 55/55 | 27.11.2018                   | 22h 20min       | 35–20                               | 9                             | 27                                    | 11                               | 52                                        | 86                                        | 55                                   | 92                                   |
| 9   | 55/60 | 27.11.2018                   | 23h 20min       | 95–45                               | 9                             | 11                                    | 0                                | 55                                        | 77                                        | 0                                    | 0                                    |
| 10  | 55/55 | 28.11.2018                   | 23h 20min       | 35–20                               | 10                            | 14                                    | 6                                | 53                                        | 76                                        | 56                                   | 75                                   |
| 10  | 55/60 | 28.11.2018                   | 22h 20min       | 50–85                               | 10                            | 1                                     | 2                                | 66                                        | 66                                        | 64                                   | 69                                   |
| 11  | 55/55 | 29.11.2018                   | 23h 40min       | 38–25                               | 11                            | 30                                    | 9                                | 53                                        | 68                                        | 56                                   | 75                                   |
| 11  | 55/60 | 29.11.2018                   | 26h 20min       | 55–45                               | 11                            | 12                                    | 7                                | 50                                        | 74                                        | 56                                   | 71                                   |
| 12  | 55/55 | 30.11.2018                   | 18h 05min       | 30–75                               | 12                            | 36                                    | 23                               | 52                                        | 92                                        | 54                                   | 87                                   |
| 12  | 55/60 | 30.11.2018                   | 18h 55min       | 45–48                               | 12                            | 11                                    | 13                               | 57                                        | 98                                        | 53                                   | 84                                   |

|    |       |            |           |       |    |     |    |    |    |    |    |
|----|-------|------------|-----------|-------|----|-----|----|----|----|----|----|
| 13 | 55/55 | 01.12.2018 | 25h 40min | 30–75 | 13 | 26  | 18 | 56 | 96 | 66 | 96 |
| 13 | 55/60 | 01.12.2018 | 26h 00min | 45–48 | 13 | 24  | 8  | 51 | 94 | 67 | 95 |
| 14 | 55/55 | 02.12.2018 | 18h 05min | 30–76 | 14 | 20  | 7  | 50 | 85 | 54 | 67 |
| 14 | 55/60 | 02.12.2018 | 18h 15min | 45–49 | 14 | 100 | 12 | 50 | 92 | 51 | 95 |
| 15 | 55/55 | 03.12.2018 | 26h 10min | 35–20 | 15 | 33  | 17 | 50 | 95 | 56 | 78 |
| 15 | 55/60 | 03.12.2018 | 28h 05min | 50–85 | 15 | 16  | 11 | 51 | 96 | 58 | 87 |
| 16 | 55/55 | 04.12.2018 | 16h 00min | 30–75 | 16 | 28  | 14 | 50 | 84 | 55 | 66 |
| 16 | 55/60 | 04.12.2018 | 16h 15min | 45–48 | 16 | 11  | 6  | 52 | 92 | 62 | 96 |
| 17 | 55/55 | 06.12.2018 | 23h 00min | 30–75 | 17 | 46  | 47 | 52 | 95 | 51 | 76 |
| 17 | 55/60 | 06.12.2018 | 23h 25min | 45–48 | 17 | 50  | 44 | 55 | 94 | 50 | 94 |
| 18 | 55/55 | 07.12.2018 | 25h 20min | 30–75 | 18 | 19  | 12 | 54 | 67 | 52 | 72 |
| 18 | 55/60 | 07.12.2018 | 22h 20min | 45–48 | 18 | 26  | 4  | 52 | 95 | 64 | 85 |
| 19 | 55/55 | 08.12.2018 | 24h 05min | 30–75 | 19 | 26  | 22 | 50 | 74 | 52 | 67 |
| 19 | 55/60 | 08.12.2018 | 27h 55min | 45–48 | 19 | 15  | 10 | 56 | 85 | 55 | 86 |
| 20 | 55/55 | 09.12.2018 | 22h 50min | 30–75 | 20 | 27  | 12 | 52 | 87 | 50 | 89 |
| 20 | 55/60 | 09.12.2018 | 18h 10min | 45–48 | 20 | 32  | 9  | 54 | 92 | 59 | 87 |
| 21 | 55/55 | 10.12.2018 | 16h 30min | 30–75 | 21 | 26  | 25 | 54 | 71 | 51 | 82 |
| 21 | 55/60 | 10.12.2018 | 16h 05min | 45–48 | 21 | 22  | 10 | 55 | 96 | 51 | 95 |

293 **Table 2: Catch rate and fit statistic results from the 0.55 and 0.60 mm biodegradable gillnets**  
 294 **vs. the 0.55 mm nylon PA set based on valid deployments for cod.** Values in parentheses represent  
 295 95% confidence intervals. DOF denotes degrees of freedom.

| Length (cm) | Catch ratio (%)      |                      |
|-------------|----------------------|----------------------|
|             | 0.55 mm              | 0.60 mm              |
| 50          | 74.59 (24.39–269.67) | 65.93 (24.43–410.77) |
| 55          | 70.97 (46.14–96.63)  | 58.57 (28.60–139.11) |
| 60          | 66.97 (47.25–87.92)  | 54.41 (29.05–94.91)  |
| 65          | 62.66 (47.73–84.43)  | 52.63 (29.65–74.56)  |
| 70          | 58.17 (40.29–82.65)  | 52.61 (30.64–70.73)  |
| 75          | 53.72 (29.74–80.38)  | 53.90 (31.20–83.56)  |
| 80          | 48.70 (21.37–70.54)  | 55.90 (33.45–106.62) |
| 85          | 45.71 (13.67–72.52)  | 57.63 (33.27–126.53) |
| 90          | 42.56 (4.97–93.69)   | 57.74 (28.19–116.21) |
| 95          | 40.37 (1.62–320.05)  | 55.26 (9.76–109.90)  |
| Average     | 62.38 (50.55–74.04)  | 54.96 (35.42–73.52)  |
| P-value     | 0.2915               | 0.0334 <sup>1</sup>  |
| Deviance    | 45.46                | 60.29                |
| DOF         | 41                   | 42                   |

296

297 **Fig 2: Size distribution, catch comparison rate and catch ratio rate for cod.** The upper figures  
 298 show the size distribution of cod caught using 0.55 mm nylon PA (black), and 0.55 mm (left) and  
 299 0.60 mm (right) biodegradable (grey) twine gillnets. The figures in the middle show the catch  
 300 comparison curve for cod, with circle marks indicating the experimental rate, and the curve indicates  
 301 the modelled catch comparison rate. The dotted line at 0.5 indicates the baseline where both gillnets  
 302 fish the same amount. The dashed curves represent the 95% confidence interval for the estimated  
 303 catch comparison curve. The lowest figure shows the estimated catch ratio curve for cod (solid line).  
 304 The dotted line at 1.0 indicates the baseline where the fishing efficiency of both gillnet types is equal.  
 305 The dashed curves represent the 95% confidence intervals of the estimated catch ratio curve.

306

307 Increasing the monofilament diameter from 0.55 mm to 0.60 mm did not have a significant effect on  
 308 the catch efficiency of biodegradable gillnets. Both types of gillnets caught a similar number of cod  
 309 in all length classes (Fig 3).

310 **Fig 3: The estimated catch ratio curve for cod** (solid line). The dashed curves represent the 95%  
311 confidence intervals of the estimated catch ratio curve. The dotted line at 1.0 indicates the baseline  
312 where the fishing efficiency of both gillnet types is equal.

### 313 **Saithe**

314 For saithe, there were 15 sets for analysis of the 0.55 mm setup and 11 for the 0.60 mm setup (Table  
315 4). Both biodegradable gillnets (0.55 and 0.60 mm) had a significantly lower catch efficiency for  
316 saithe compared to the traditional nylon PA net (0.55 mm) with estimated efficiencies of 83.40%  
317 (71.34–94.86) and 83.87% (66.36–104.92) compared with the nylon PA net, respectively (Table 5  
318 and Fig 4).

319

320

321

322

323



324 **Table 4: Catch data from all deployments for saithe.** The rows highlighted in grey indicates sets used in the analysis (sets containing at least  
 325 10 saithe). The setups with 55 mm nylon PA gillnets / 55 or 60 mm biodegradable gillnets are indicated by 55/55 and 55/60.  
 326

| Set | Setup | Setting date<br>(dd.mm.yyyy) | Fishing<br>time | Fishing depth (m)<br>(min – max) | Acc. no. of<br>deployments | No. of saithe<br>in nylon PA<br>gillnets | No. of saithe<br>in bio<br>gillnets | Min. saithe<br>length in<br>nylon PA<br>gillnets | Max. saithe<br>length in<br>nylon PA<br>gillnets | Min. saithe<br>length in<br>bio gillnets | Max. saithe<br>length in<br>bio gillnets |
|-----|-------|------------------------------|-----------------|----------------------------------|----------------------------|------------------------------------------|-------------------------------------|--------------------------------------------------|--------------------------------------------------|------------------------------------------|------------------------------------------|
| 1   | 55/55 | 07.09.2018                   | 19h 45min       | 140                              | 1                          | 4                                        | 2                                   | 64                                               | 74                                               | 64                                       | 67                                       |
| 1   | 55/60 | 07.09.2018                   | 19h 45min       | 120                              | 1                          | 0                                        | 0                                   | 0                                                | 0                                                | 0                                        | 0                                        |
| 2   | 55/55 | 11.09.2018                   | 21h 45min       | 110                              | 2                          | 3                                        | 0                                   | 73                                               | 83                                               | 0                                        | 0                                        |
| 2   | 55/60 | 11.09.2018                   | 22h 10min       | 130                              | 2                          | 3                                        | 2                                   | 67                                               | 70                                               | 69                                       | 73                                       |
| 3   | 55/55 | 31.10.2018                   | 27h 30min       | 170–140                          | 3                          | 9                                        | 4                                   | 54                                               | 69                                               | 50                                       | 75                                       |
| 3   | 55/60 | 31.10.2018                   | 26h 15min       | 130–110                          | 3                          | 3                                        | 0                                   | 50                                               | 75                                               | 0                                        | 0                                        |
| 4   | 55/55 | 01.11.2018                   | 22h 40min       | 180–160                          | 4                          | 3                                        | 1                                   | 65                                               | 76                                               | 70                                       | 70                                       |
| 4   | 55/60 | 01.11.2018                   | 24h 15min       | 110–130                          | 4                          | 0                                        | 1                                   | 0                                                | 0                                                | 50                                       | 50                                       |
| 5   | 55/55 | 02.11.2018                   | 22h 40min       | 100–120                          | 5                          | 4                                        | 2                                   | 62                                               | 77                                               | 63                                       | 70                                       |
| 5   | 55/60 | 02.11.2018                   | 23h 55min       | 105–125                          | 5                          | 5                                        | 3                                   | 61                                               | 71                                               | 59                                       | 68                                       |
| 6   | 55/55 | 12.11.2018                   | 24h 50min       | 25–30                            | 6                          | 21                                       | 13                                  | 59                                               | 83                                               | 59                                       | 86                                       |
| 6   | 55/60 | 12.11.2018                   | 24h 15min       | 50–70                            | 6                          | 17                                       | 8                                   | 52                                               | 87                                               | 56                                       | 77                                       |
| 7   | 55/55 | 13.11.2018                   | 21h 20min       | 25–30                            | 7                          | 3                                        | 1                                   | 67                                               | 72                                               | 68                                       | 68                                       |
| 7   | 55/60 | 13.11.2018                   | 21h 45min       | 50–70                            | 7                          | 10                                       | 3                                   | 64                                               | 88                                               | 65                                       | 81                                       |
| 8   | 55/55 | 14.11.2018                   | 22h 00min       | 50–70                            | 8                          | 4                                        | 0                                   | 65                                               | 82                                               | 0                                        | 0                                        |
| 8   | 55/60 | 14.11.2018                   | 18h 20min       | 50–70                            | 8                          | 6                                        | 0                                   | 65                                               | 86                                               | 0                                        | 0                                        |
| 9   | 55/55 | 27.11.2018                   | 22h 20min       | 35–20                            | 9                          | 47                                       | 42                                  | 50                                               | 91                                               | 50                                       | 86                                       |
| 9   | 55/60 | 27.11.2018                   | 23h 20min       | 95–45                            | 9                          | 8                                        | 3                                   | 62                                               | 79                                               | 58                                       | 76                                       |
| 10  | 55/55 | 28.11.2018                   | 23h 20min       | 35–20                            | 10                         | 17                                       | 13                                  | 51                                               | 72                                               | 50                                       | 63                                       |
| 10  | 55/60 | 28.11.2018                   | 22h 20min       | 50–85                            | 10                         | 0                                        | 0                                   | 0                                                | 0                                                | 0                                        | 0                                        |
| 11  | 55/55 | 29.11.2018                   | 23h 40min       | 38–25                            | 11                         | 25                                       | 33                                  | 50                                               | 81                                               | 50                                       | 85                                       |
| 11  | 55/60 | 29.11.2018                   | 26h 20min       | 55–45                            | 11                         | 27                                       | 17                                  | 53                                               | 80                                               | 54                                       | 77                                       |
| 12  | 55/55 | 30.11.2018                   | 18h 05min       | 30–75                            | 12                         | 34                                       | 30                                  | 50                                               | 81                                               | 50                                       | 88                                       |
| 12  | 55/60 | 30.11.2018                   | 18h 55min       | 45–48                            | 12                         | 2                                        | 6                                   | 70                                               | 80                                               | 65                                       | 77                                       |

|    |       |            |           |       |    |    |    |    |    |    |    |
|----|-------|------------|-----------|-------|----|----|----|----|----|----|----|
| 13 | 55/55 | 01.12.2018 | 25h 40min | 30–75 | 13 | 28 | 23 | 50 | 92 | 60 | 85 |
| 13 | 55/60 | 01.12.2018 | 26h 00min | 45–48 | 13 | 6  | 3  | 61 | 72 | 67 | 80 |
| 14 | 55/55 | 02.12.2018 | 18h 05min | 30–76 | 14 | 26 | 20 | 50 | 82 | 54 | 77 |
| 14 | 55/60 | 02.12.2018 | 18h 15min | 45–49 | 14 | 2  | 7  | 75 | 75 | 57 | 79 |
| 15 | 55/55 | 03.12.2018 | 26h 10min | 35–20 | 15 | 44 | 33 | 50 | 78 | 51 | 80 |
| 15 | 55/60 | 03.12.2018 | 28h 05min | 50–85 | 15 | 20 | 19 | 61 | 88 | 55 | 81 |
| 16 | 55/55 | 04.12.2018 | 16h 00min | 30–75 | 16 | 16 | 15 | 50 | 78 | 53 | 73 |
| 16 | 55/60 | 04.12.2018 | 16h 15min | 45–48 | 16 | 9  | 12 | 54 | 85 | 58 | 84 |
| 17 | 55/55 | 06.12.2018 | 23h 00min | 30–75 | 17 | 26 | 23 | 51 | 78 | 51 | 76 |
| 17 | 55/60 | 06.12.2018 | 23h 25min | 45–48 | 17 | 61 | 52 | 59 | 96 | 55 | 87 |
| 18 | 55/55 | 07.12.2018 | 25h 20min | 30–75 | 18 | 31 | 11 | 50 | 73 | 50 | 70 |
| 18 | 55/60 | 07.12.2018 | 22h 20min | 45–48 | 18 | 3  | 11 | 62 | 75 | 57 | 77 |
| 19 | 55/55 | 08.12.2018 | 24h 05min | 30–75 | 19 | 51 | 40 | 50 | 86 | 50 | 84 |
| 19 | 55/60 | 08.12.2018 | 27h 55min | 45–48 | 19 | 20 | 12 | 53 | 88 | 61 | 81 |
| 20 | 55/55 | 09.12.2018 | 22h 50min | 30–75 | 20 | 54 | 39 | 50 | 81 | 50 | 82 |
| 20 | 55/60 | 09.12.2018 | 18h 10min | 45–48 | 20 | 15 | 9  | 53 | 77 | 54 | 85 |
| 21 | 55/55 | 10.12.2018 | 16h 30min | 30–75 | 21 | 47 | 58 | 52 | 76 | 50 | 86 |
| 21 | 55/60 | 10.12.2018 | 16h 05min | 45–48 | 21 | 22 | 21 | 50 | 82 | 55 | 72 |

327

328

329

330 **Table 5: Catch rate and fit statistic results from the 0.55 and 0.60 mm biodegradable gillnets**  
 331 **vs. the 0.55 mm nylon PA set based on valid deployments for saithe.** Values in parentheses  
 332 represent the 95% confidence intervals. DOF denotes the degrees of freedom.

| Length (cm) | Catch ratio (%)       |                       |
|-------------|-----------------------|-----------------------|
|             | 0.55 mm               | 0.60 mm               |
| 50          | 103.33 (64.00–199.22) | 126.66 (70.30–608.14) |
| 55          | 94.42 (73.90–140.63)  | 124.11 (76.96–319.85) |
| 60          | 86.58 (70.16–110.11)  | 110.00 (70.75–186.24) |
| 65          | 80.20 (63.52–92.19)   | 93.93 (60.67–137.33)  |
| 70          | 75.54 (53.68–88.66)   | 79.96 (53.35–110.59)  |
| 75          | 72.85 (46.76–95.12)   | 68.32 (46.18–97.93)   |
| 80          | 72.49 (47.52–119.27)  | 57.43 (36.45–96.40)   |
| 85          | 75.14 (43.22–261.02)  | 45.23 (25.14–79.05)   |
| 90          | 81.86 (31.08–1550.13) | 32.05 (8.66–67.15)    |
| 95          | 93.83 (19.72–8043.05) | 23.18 (1.29–62.48)    |
| Average     | 83.40 (71.34–94.86)   | 83.87 (66.36–104.92)  |
| P-value     | 0.6438                | 0.4114                |
| Deviance    | 33.29                 | 35.19                 |
| DOF         | 37                    | 34                    |

333

334 **Fig 4: Size distribution, catch comparison rate and catch ratio rate for saithe.** The upper figure  
 335 shows the size distribution of saithe caught using the 0.55 mm nylon PA (black), and 0.55 mm (left)  
 336 and 0.60mm (right) biodegradable (grey) twine gillnets. The figure in the middle shows the estimated  
 337 catch ratio curve for saithe (solid line). The dotted line at 1.0 indicates the baseline where the fishing  
 338 efficiency of both gillnet types is equal. The dashed curves represent the 95% confidence interval of  
 339 the estimated catch ratio curve. The lowest figure shows the catch comparison curve for saithe, with  
 340 circle marks indicating the experimental rate, and the curve indicates the modelled catch comparison  
 341 rate. The dotted line at 1.0 indicates the baseline where fishing efficiency of both gillnet types is  
 342 equal. The dashed curves represent the 95% confidence intervals of the estimated catch ratio curve.

343

344 Increasing the monofilament diameter from 0.55 mm to 0.60 mm did not have a significant effect on  
 345 the catch efficiency of biodegradable gillnets. Both types of gillnets caught a similar number of saithe  
 346 in all length classes (Fig 5).

347 **Fig 5: The estimated catch ratio curve for saithe** (solid line). The dashed curves represent the 95%  
348 confidence interval of the estimated catch ratio curve. The dotted line at 1.0 indicates the baseline  
349 where fishing efficiency of both gillnet types is equal.

350

## 351 **Mechanical properties of the gillnets**

352 New 0.55 mm nylon PA gillnets were 9.7% (t-test,  $p = 2.5 \times 10^{-5}$ ) stronger than 0.55 mm biodegradable  
353 gillnets, and as strong as the 0.60 mm biodegradable gillnets (t-test,  $p = 0.402$ ). New 0.55 mm nylon  
354 PA gillnets elongated significantly less at break than the 0.55 mm (17.0%; t-test,  $p = 7.1 \times 10^{-17}$ ) and  
355 0.60 mm (16.6%; t-test,  $p = 1.6 \times 10^{-19}$ ) biodegradable gillnets. The  $E_1$  and  $E_2$  of new nylon PA nets  
356 were significantly higher (t-test,  $p < 0.001$ ) than the new 0.55 mm and 0.60 mm gillnets (Table 6).

357

358 Used 0.55 mm nylon PA gillnets were significantly stronger (26.9%; t-test,  $p = 1.7 \times 10^{-8}$ ) and (17.7%;  
359 t-test,  $p = 2.2 \times 10^{-5}$ ) than 0.55mm and 0.60mm biodegradable gillnets, respectively. Used 0.55 mm  
360 nylon PA gillnets elongated significantly less (26.2%; t-test,  $p = 4 \times 10^{-14}$ ) and (26.4%; t-test,  $p =$   
361  $8.2 \times 10^{-12}$ ) at break than 0.55 mm and 0.60 mm used biodegradable gillnets, respectively. The  $E_1$  and  
362  $E_2$  of used nylon PA gillnets was significantly higher (t-test,  $p < 0.001$ ) than that for 0.55 mm and  
363 0.60 mm used biodegradable gillnets, respectively (Table 6).

364

365 Nylon PA gillnets were as strong, elongated 14.6% less at break (from 32.7 to 27.9%; t-test,  $p = 1.49 \times$   
366  $10^{-8}$ ), and were significantly more elastic ( $E_1 = 20.3\%$  and  $E_2 = 13.9\%$ ; t-test,  $p < 0.001$ ) after having  
367 been deployed 21 times at sea. Both types of biodegradable gillnets suffered significant reductions in  
368 tensile strength (t-test,  $p < 0.001$ ). The 0.55 mm biodegradable gillnet decreased from 13.3 to 11.5 kg  
369 and the 0.60 mm biodegradable gillnet decreased from 14.9 to 12.4 kg after being used 21 times at  
370 sea. The 0.55 and 0.60 mm nets elongated significantly less at break (4.0%; t-test,  $p = 3.31 \times 10^{-2}$ )  
371 and (8.1%; t-test,  $p = 7.70 \times 10^{-4}$ ), respectively, and  $E_1$  and  $E_2$  increased after use (Table 6).

372

373

374

375 **Table 6: Mechanical properties of the gillnets.** Mean tensile strength, elongation at break,  $E_1$  and  $E_2$  with 95% confidence intervals (in brackets) for  
 376 new and used gillnets.

| Gillnet type         | Tensile strength (kg) |                     |              | Elongation at break (%) |                     |              | $E_1$                     |                           |              | $E_2$                     |                           |              |
|----------------------|-----------------------|---------------------|--------------|-------------------------|---------------------|--------------|---------------------------|---------------------------|--------------|---------------------------|---------------------------|--------------|
|                      | New                   | Used                | % difference | New                     | Used                | % difference | New                       | Used                      | % difference | New                       | Used                      | % difference |
| 0.55mm Nylon PA      | 14.6<br>(14.2–15.1)   | 14.6<br>(13.9–15.1) | –0.0         | 32.7<br>(31.9–33.4)     | 27.9<br>(26.9–28.9) | –14.6        | 0.2857<br>(0.2808–0.2906) | 0.3437<br>(0.3382–0.3492) | 20.3 %       | 0.4131<br>(0.3994–0.4268) | 0.4709<br>(0.4644–0.4773) | 13.9 %       |
| 0.55mm Biodegradable | 13.3<br>(13.1–13.5)   | 11.5<br>(10.9–12.1) | –13.5        | 39.4<br>(38.8–39.9)     | 37.8<br>(36.6–39.1) | –4.0         | 0.2078<br>(0.2027–0.2130) | 0.2319<br>(0.2280–0.2358) | 11.6 %       | 0.2469<br>(0.2406–0.2532) | 0.2511<br>(0.2386–0.2637) | 1.7 %        |
| 0.60mm Biodegradable | 14.9<br>(14.5–15.3)   | 12.4<br>(11.7–13.0) | –16.7        | 39.2<br>(38.5–39.8)     | 37.9<br>(36.3–39.4) | –8.1         | 0.2619<br>(0.2571–0.2666) | 0.2714<br>(0.2629–0.2799) | 3.6 %        | 0.3074<br>(0.2991–0.3158) | 0.3227<br>(0.3112–0.3342) | 4.9 %        |

377

378

379

380

381

382

383 The fitted force-elongation curves from tensile testing (Fig 6) shows that used nylon PA gillnets  
384 exhibited an increase in stiffness, while used biodegradable gillnets experienced a slight decrease.

385

386 **Fig 6: Force–elongation curves of new and used gillnets.** Elongation is shown as a percentage  
387 relative to the initial length.

## 388 Discussion

389 Increasing the monofilament thickness of biodegradable gillnets from 0.55 to 0.60 mm to match the  
390 tensile strength of the 0.55 mm nylon PA gillnets did not improve their catch efficiency. No difference  
391 in breaking strength between 0.55 mm nylon PA and 0.60 mm biodegradable gillnets was detected  
392 when the gillnets were new. However, the 0.55 mm nylon PA gillnets caught significantly more cod  
393 and saithe than the 0.60 mm biodegradable gillnets during the fishing season and generally showed  
394 better catch rates for most length classes. Our results are consistent with those reported by Grimaldo,  
395 et al. [18, 19] for the catch characteristics of gillnets for cod, saithe and Greenland halibut  
396 (*Reinhardtius hippoglossoides*), those of Bae et al. [24] for flounder (*Cleisthenes pinetorum*), and  
397 those of Kim et al. for yellow croaker (*Larimichthys polyactis*). These researchers found that the  
398 fishing efficiency of nylon PA gillnets was 1.1- to 1.4-times higher than biodegradable gillnets and  
399 concluded that differences in the mechanical properties of the materials (i.e., tensile strength) could  
400 explain the differences in catch efficiency. All of these studies showed that biodegradable gillnets  
401 were generally 10–16% weaker and elongate 8–10% more at break than nylon PA gillnets of similar  
402 twine diameter. However, none of these studies carried out a more comprehensive assessment of the  
403 potential effects of other mechanical properties (i.e., elongation, elasticity, stiffness) on the catch  
404 efficiency of the gillnets. The results of our study suggests that tensile strength may not be the main  
405 cause of the low catch efficiency of biodegradable gillnets relative to that of nylon PA gillnets, and

406 we therefore speculate whether the elasticity and stiffness may better explain the catch efficiency  
407 patterns of nylon PA and biodegradable gillnets.

408

409 Significant differences in the elasticity and stiffness were found between biodegradable and nylon  
410 PA gillnets and therefore these two parameters may have caused the differences in catch efficiency  
411 between the gillnets. The increased stiffness of monofilaments can be identified as an increased slope  
412 in a force-elongation curve from tensile testing, and a change in the stiffness properties of the  
413 monofilaments after use may indicate degradation (or deterioration) of the polymer material. The  
414 fitted force-elongation curves from tensile testing shown in Fig 6 shows an increase in the stiffness  
415 of used nylon PA monofilaments, while the used biodegradable monofilaments experienced the  
416 opposite effect. The ratio of force-elongation is elasticity-stiffness, but only the force defines the  
417 strength of the material. Strength measures how much stress the material can handle before permanent  
418 deformation or fracture occurs, whereas stiffness measures the resistance to elastic deformation. In  
419 contrast to nylon PA gillnets, biodegradable gillnets increased in elasticity and reduced in stiffness  
420 after use. Based on these results, we speculate whether the biodegradable gillnets became too elastic  
421 and consequently fish could easily press themselves through the meshes of the gillnet and avoid  
422 capture. The force-elongation curves from earlier experiments obtained from biodegradable and  
423 nylon PA gillnet samples (Fig 7) give an indication of the differences in elongation and stiffness  
424 between these two types of gillnets. Although Fig 7 shows a large variation in the results for type of  
425 gillnets and year, it is possible to see a certain tendency for the nylon PA gillnets to be stiffer than the  
426 biodegradable gillnets, when new and used. It also seems that used biodegradable gillnets tend to  
427 become less stiff and elongate less than nylon PA gillnets after use.

428

429 **Fig 7: Force-elongation curves of new and used gillnets from experiments carried out in 2017-**  
430 **2019.** Elongation is given as a percentage relative to the initial length.

431

432 The elasticity and stiffness of nylon PA and biodegradable materials are probably closely related to  
433 the way these two types of gillnet catch fish, better known as "catching modes" [35]. For instance, a  
434 stiffer and less elastic material may catch more fish by gilling, while a more flexible and elastic  
435 material can fish more by snagging. A quantification of the number and length distribution of fish  
436 caught per catching mode type can potentially provide information on the effect that elasticity and  
437 stiffness have on the catch efficiency of gillnets. This information can also be used for improving size  
438 selectivity and to narrow the wide selection range that traditional gillnets are known for. Knowing  
439 more about the effect of elasticity and stiffness on the catching modes can also lead to the enhancement  
440 of some catch methods to improve catch quality, since wedging and entangling are known to cause  
441 marks in the fish and reduce the quality of the filet, while snagging and gilling may yield better quality  
442 fish. Unfortunately, our experimental setups did not allow us to investigate how the elastic modulus  
443 affects the catch efficiency of the gillnets, and consequently this is only a hypothesis that should be  
444 investigated in future experiments.

445

446 The deterioration of nylon PA and biodegradable gillnets in this experiment was the result of chemical  
447 and mechanical changes that occurred during the three-month experimental period. Different  
448 mechanisms of degradation might have acted simultaneously on the nylon PA and biodegradable  
449 fibers, and some probably had a stronger effect than others. Although this experiment was unable to  
450 identify and quantify the effect of specific mechanisms of degradation of the gillnets that were  
451 studied, possible degradation mechanisms during the field experiments are microbiological  
452 degradation, hydrolysis, oxidation, and mechanical damage (i.e., abrasion in the hauling machine,  
453 friction due to contact with hard surfaces when the gillnets were operated on deck). Polymers are also  
454 known to also be vulnerable to UV-exposure, however since the experiment was carried out during



455 the last part of the polar night period in northern Norway, we consider the effect of UV-radiation to  
456 be negligible.

457

## 458 **Acknowledgements**

459 This study was financed by the Regional Research Council Region Northern Norway and the  
460 Norwegian Directorate of Fisheries. We are very grateful to captain Bent Gabrielsen and the crew on  
461 board the “MS Karoline” for their help in the fishing trials. We would like to thank S-ENPOL Co.  
462 Ltd. for their collaboration in this project and for providing the gillnet samples to carry out the  
463 experiments at sea.

## 464 **References**

- 465 [1] FAO. The State of World Fisheries and Aquaculture 2018 - Meeting the sustainable  
466 development goals. Rome. 2018. ISBN 978-92-5-130562-1.
- 467 [2] Fisheries Directorate of Norway (2020) Catches and licences  
468 <https://www.fiskeridir.no/Yrkesfiske/Tall-og-analyse/Fangst-og-kvoter>
- 469 [3] Fisheries Directorate of Norway (2020) Fishermen, vessels and permits.  
470 <https://www.fiskeridir.no/Yrkesfiske/Tall-og-analyse/Fiskere-fartoy-og-tillatelser>
- 471 [4] Deshpande PC, Philis G, Brattebø H, Fet AF. Using Material Flow Analysis (MFA) to  
472 generate the evidence on plastic waste management from commercial fishing gears in Norway.  
473 *Resour conserve recy.* 2020; 5: 100024. <https://doi.org/10.1016/j.rcrx.2019.100024>
- 474 [5] Sundt P, Briedis R, Skogesal O, Standal E, Rødås Johnsen H, Schulze P. Basis for assessing  
475 the producer responsibility scheme for the fishing and aquaculture industry. Report of the  
476 Norwegian Environmental Agency. 2018; M-1052, 178 pp.
- 477 [6] Macfadyen G, Huntington T, Cappell R. Abandoned, lost or otherwise discarded fishing gear.

- 478       FAO Fisheries and Aquaculture Technical Paper, 2009 (No.523): p. 115 pp.
- 479 [7] Schaefer MB. Some Considerations of Population Dynamics and Economics in Relation to the  
480       Management of the Commercial Marine Fisheries. J Fish Res Board Can. 1957. 14(5): p. 669–  
481       681.
- 482 [8] Hareide NR, Garnes G, Rihan D, Mulligan M, Tyndall P, Clark M, et al. A Preliminary  
483       Investigation on Shelf Edge and Deepwater Fixed Net Fisheries to the West and North of Great  
484       Britain, Ireland, around Rockall and Hatton Bank. ICES CM 2005/ N:07, 2005.
- 485 [9] Large PA, Graham N, Hareide NR, Misund R, Rihan D, Mulligan M, et al. Lost and  
486       abandoned nets in deep-water gillnet fisheries in the Northeast Atlantic: retrieval exercises and  
487       outcomes. ICES J Mar Sci. 2009; 66(2): 323–333. <https://doi.org/10.1093/icesjms/fsn220>
- 488 [10] Norwegian Fisheries Directorate (2019). Lost fishing gears and ghost fishing.  
489       <https://www.fiskeridir.no/Yrkesfiske/Areal-og-miljoe/Tapte-fiskeredskap>
- 490 [11] Tokiwa Y, Calabia BP, Ugwu CU, Aiba S. Biodegradability of plastics. Int J Mol Sci. 2009,  
491       10(9): 3722–3742. <https://doi.org/10.3390/ijms10093722>
- 492 [12] Park SW, Bae JH, Lim JH, Cha BJ, Park CD, Yang YS, Ahn HC. Development and physical  
493       properties on the monofilament for gill nets and traps using biodegradable aliphatic  
494       polybutylene succinate resin. J Kor Soc Fish Tech. 2007; 43(4): 281–290.  
495       <https://doi.org/10.3796/KSFT.2007.43.4.281>
- 496 [13] Park SW, Bae JH, Weatherability of biodegradable polybutylene succinate (PBS)  
497       monofilaments. J Kor Soc Fish Tech. 2008; 44(4): 265–272.  
498       <https://doi.org/10.3796/KSFT.2008.44.4.265>
- 499 [14] Kim S, Park S, Lee K, Lim J. Characteristics on the fishing performance of a drift net for  
500       yellow croaker (*Larimichthys polyactis*) in accordance with the thickness of a net twine. J Kor  
501       Soc Fish Tech. 2013; 49(3): 218–226. <https://doi.org/10.3796/KSFT.2012.49.3.218>

- 502 [15] Kim S, Park S, Lee K. Fishing performance of an Octopus minor net pot made of  
503 biodegradable twines. *Turkish J Fish Aquat Sci.* 2014a; 14: 21–30.
- 504 [16] Kim S, Park S, Lee K. Fishing performance of environmentally friendly tubular pots made of  
505 biodegradable resin (PBS/PBAT) for catching the conger eel *Conger Myriaster*. *Fish Sci.* 2014b;  
506 80: 887–895. <https://doi.org/10.1007/s12562-014-0785-z>
- 507 [17] Kim S, Kim P, Lim J, An H, Suuronen P. Use of biodegradable driftnets to prevent ghost  
508 fishing: physical properties and fishing performance for yellow croaker. *Anim Conserv.* 2016;  
509 19: 309–319. <https://doi.org/10.1111/acv.12256>
- 510 [18] Grimaldo E, Herrmann B, Tveit G, Vollstad J, Schei M. Effect of using biodegradable PBSAT  
511 gillnets on the catch efficiency and quality of Greenland halibut (*Reinhardtius*  
512 *hippoglossoides*). *Mar Coast Fish.* 2018a. 10:619–629. <https://doi.org/10.1002/mcf2.10058>
- 513 [19] Grimaldo E, Herrmann B, Vollstad J, Su B, Moe Føre H, Larsen RB. Fishing efficiency of  
514 biodegradable PBSAT gillnets and conventional nylon gillnets used in Norwegian cod (*Gadus*  
515 *morhua*) and saithe (*Pollachius virens*) fisheries. *ICES J Mar Sci.* 2018b; 75(6): 2245–2256.  
516 <https://doi.org/10.1093/icesjms/fsy108>
- 517 [20] Grimaldo E, Herrmann, Vollstad J, Su B, Moe Føre H, Larsen RB. Comparison of fishing  
518 efficiency between biodegradable gillnets and conventional nylon gillnets. *Fish Res.* 2019;  
519 213: 67–74. <https://doi.org/10.1016/j.fishres.2019.01.003>
- 520 [21] Urbanek AK, Rymowicz W, Strzelectki M, Kociuba W, Franczak K, Mironczuc A. Isolation  
521 and characterization of Arctic microorganisms decomposing bioplastics. *AMB Express.* 2017;  
522 7(1): 148–148. <https://doi.org/10.1186/s13568-017-0448-4>
- 523 [22] Sekiguchi T, Saika A, Nomura K, Watanabe T, Fujimoto Y, Enoko M, et al. Biodegradation of  
524 aliphatic polyesters soaked in deep seawaters and isolation of poly( $\epsilon$ -caprolactone)-degrading  
525 bacteria. *Polym Degrad Stab.* 2011; 96(7): 1397–1403.  
526 <https://doi.org/10.1016/j.polyimdegradstab.2011.03.004>

- 527 [23] Bae BS, Cho SK, Park SW, Kim, SH. Catch characteristics of the biodegradable gill net for  
528 flounder. *J Kor Soc Fish Tech.* 2012; 48(4): 310–321.  
529 <https://doi.org/10.3796/KSFT.2012.48.4.310>
- 530 [24] Bae BS, Lim JH, Park SW, Kim SH, Cho SK. Catch characteristics of gillnets for flounder by  
531 the physical properties of net filament in the East Sea. *J Kor Soc Fish Tech.* 2013; 49(2): 095–  
532 105. <https://doi.org/10.3796/KSFT.2013.49.2.095>
- 533 [25] Kim MK, Yun KC, Kang GD, Ahn JS, Kang SM, Kim YJ, et al. Biodegradable resin  
534 composition and fishing net produced from same. US 2017/0112111A1, 2017.
- 535 [26] Su B, Føre HM, Grimaldo E. A comparative study of the mechanical properties of  
536 biodegradable PBSAT and PA gillnets in Norwegian coastal waters. OMAE2019-95350 2019.
- 537 [27] Herrmann B, Sistiaga M, Nielsen KN, Larsen RB. Understanding the size selectivity of redfish  
538 (*Sebastes spp.*) in North Atlantic trawl codends. *J Northw Atl Fish Sci.* 2012; 44: 1–13.  
539 <http://dx.doi.org/10.2960/J.v44.m680>
- 540 [28] Herrmann B, Krag LA, Feekings J, Noack T. Understanding and predicting size selection in  
541 diamond-mesh cod ends for Danish seining: a study based on sea trials and computer  
542 simulations. *Mar Coast Fish.* 2016; 8: 277–291.  
543 <https://doi.org/10.1080/19425120.2016.1161682>
- 544 [29] Herrmann B, Sistiaga M, Rindahl L, Tatone I. Estimation of the effect of gear design changes  
545 on catch efficiency: Methodology and a case study for a Spanish longline fishery targeting  
546 hake (*Merluccius merluccius*). *Fish Res.* 2017; 185: 153–160.  
547 <https://doi.org/10.1016/j.fishres.2016.09.013>
- 548 [30] Burnham KP, Anderson DR. *Model Selection and Multimodel Inference: A Practical*  
549 *Information-theoretic Approach.* 2nd ed. Springer, New York. 2002. ISBN 978-0-387-22456-  
550 5.
- 551 [31] Wileman DA, Ferro RST, Fonteyne R, Millar RB. *Manual of Methods of Measuring the*

- 552 Selectivity of Towed Fishing Gears. ICES Coop. Res. Rep. No. 215, 1996. ICES, Copenhagen,  
553 Denmark. ISSN 1017–6195.
- 554 [32] Efron B. The jackknife, the bootstrap and other resampling plans. In: SIAM Monograph No.  
555 38, CBMS-NSF Regional Conference Series in Applied Mathematics, Philadelphia. 1982.  
556 ISBN: 978-0-89871-179-0.
- 557 [33] Herrmann B, Krag LA, Krafft BA. Size selection of Antarctic krill (*Euphausia superba*) in a  
558 commercial codend and trawl body. *Fish Res.* 2018; 207: 49–54.
- 559 [34] Veiga-Malta T, Feekings J, Herrmann B, Krag LA. Industry-led fishing gear development: Can  
560 it facilitate the process? *Ocean Coast Manag.* 2019; 177: 148–155.  
561 <https://doi.org/10.1016/j.ocecoaman.2019.05.009>
- 562 [35] Grati F, Bolognini L, Domenichetti F, Fabi G, Polidori P, Santelli A, et al. The effect of  
563 monofilament thickness on the catches of gillnets for common sole in the Mediterranean small-  
564 scale fishery. *Fish Res.* 2015. 164: 170–177. <https://doi.org/10.1016/j.fishres.2014.11.014>

## 566 **Supporting information**

567 **S1 Fig. Catch data for individual sets for cod.** The catch data consists of count data for numbers  
568 of cod caught in the biodegradable gillnets (Test 1) and nylon PA gillnets (Test 2) for each size  
569 class (Length) corresponding to total fish length.

571 **S1 Fig. Catch data for individual sets for saithe.** The catch data consists of count data for  
572 numbers of saithe caught in the biodegradable gillnets (Test 1) and nylon PA gillnets (Test 2) for  
573 each size class (Length) corresponding to total fish length.

574

575

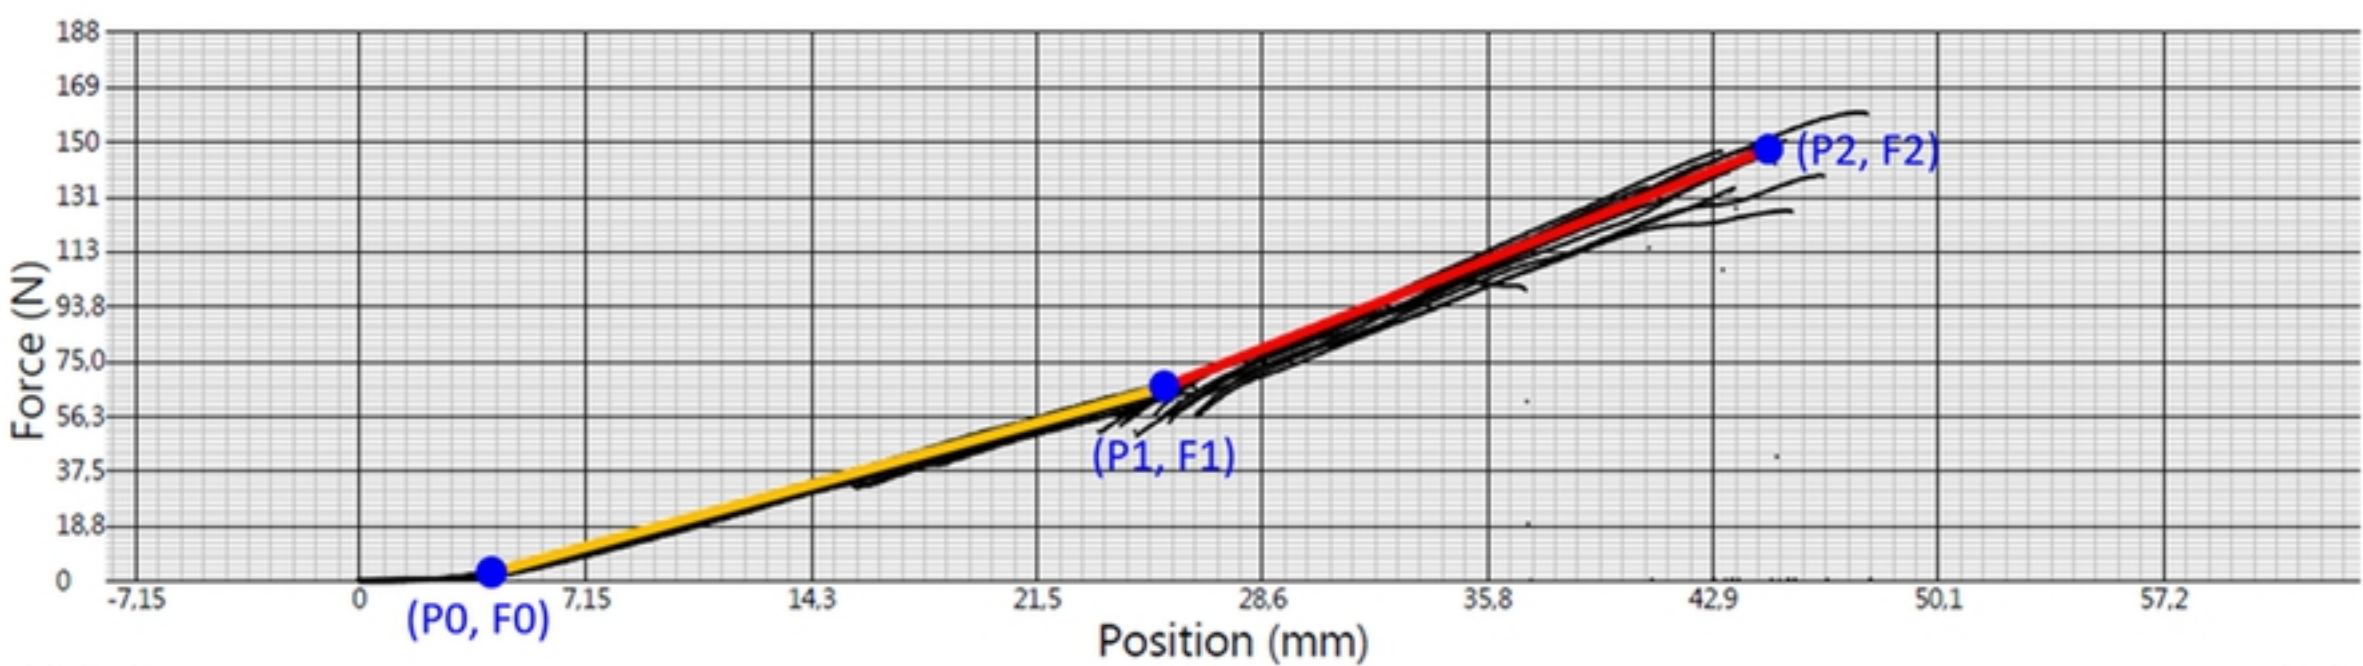

$$\text{Elasticity 1} = (F1-F0)/(P1-P0)$$

$$\text{Elasticity 2} = (F2-F1)/(P2-P1)$$

Figure 1



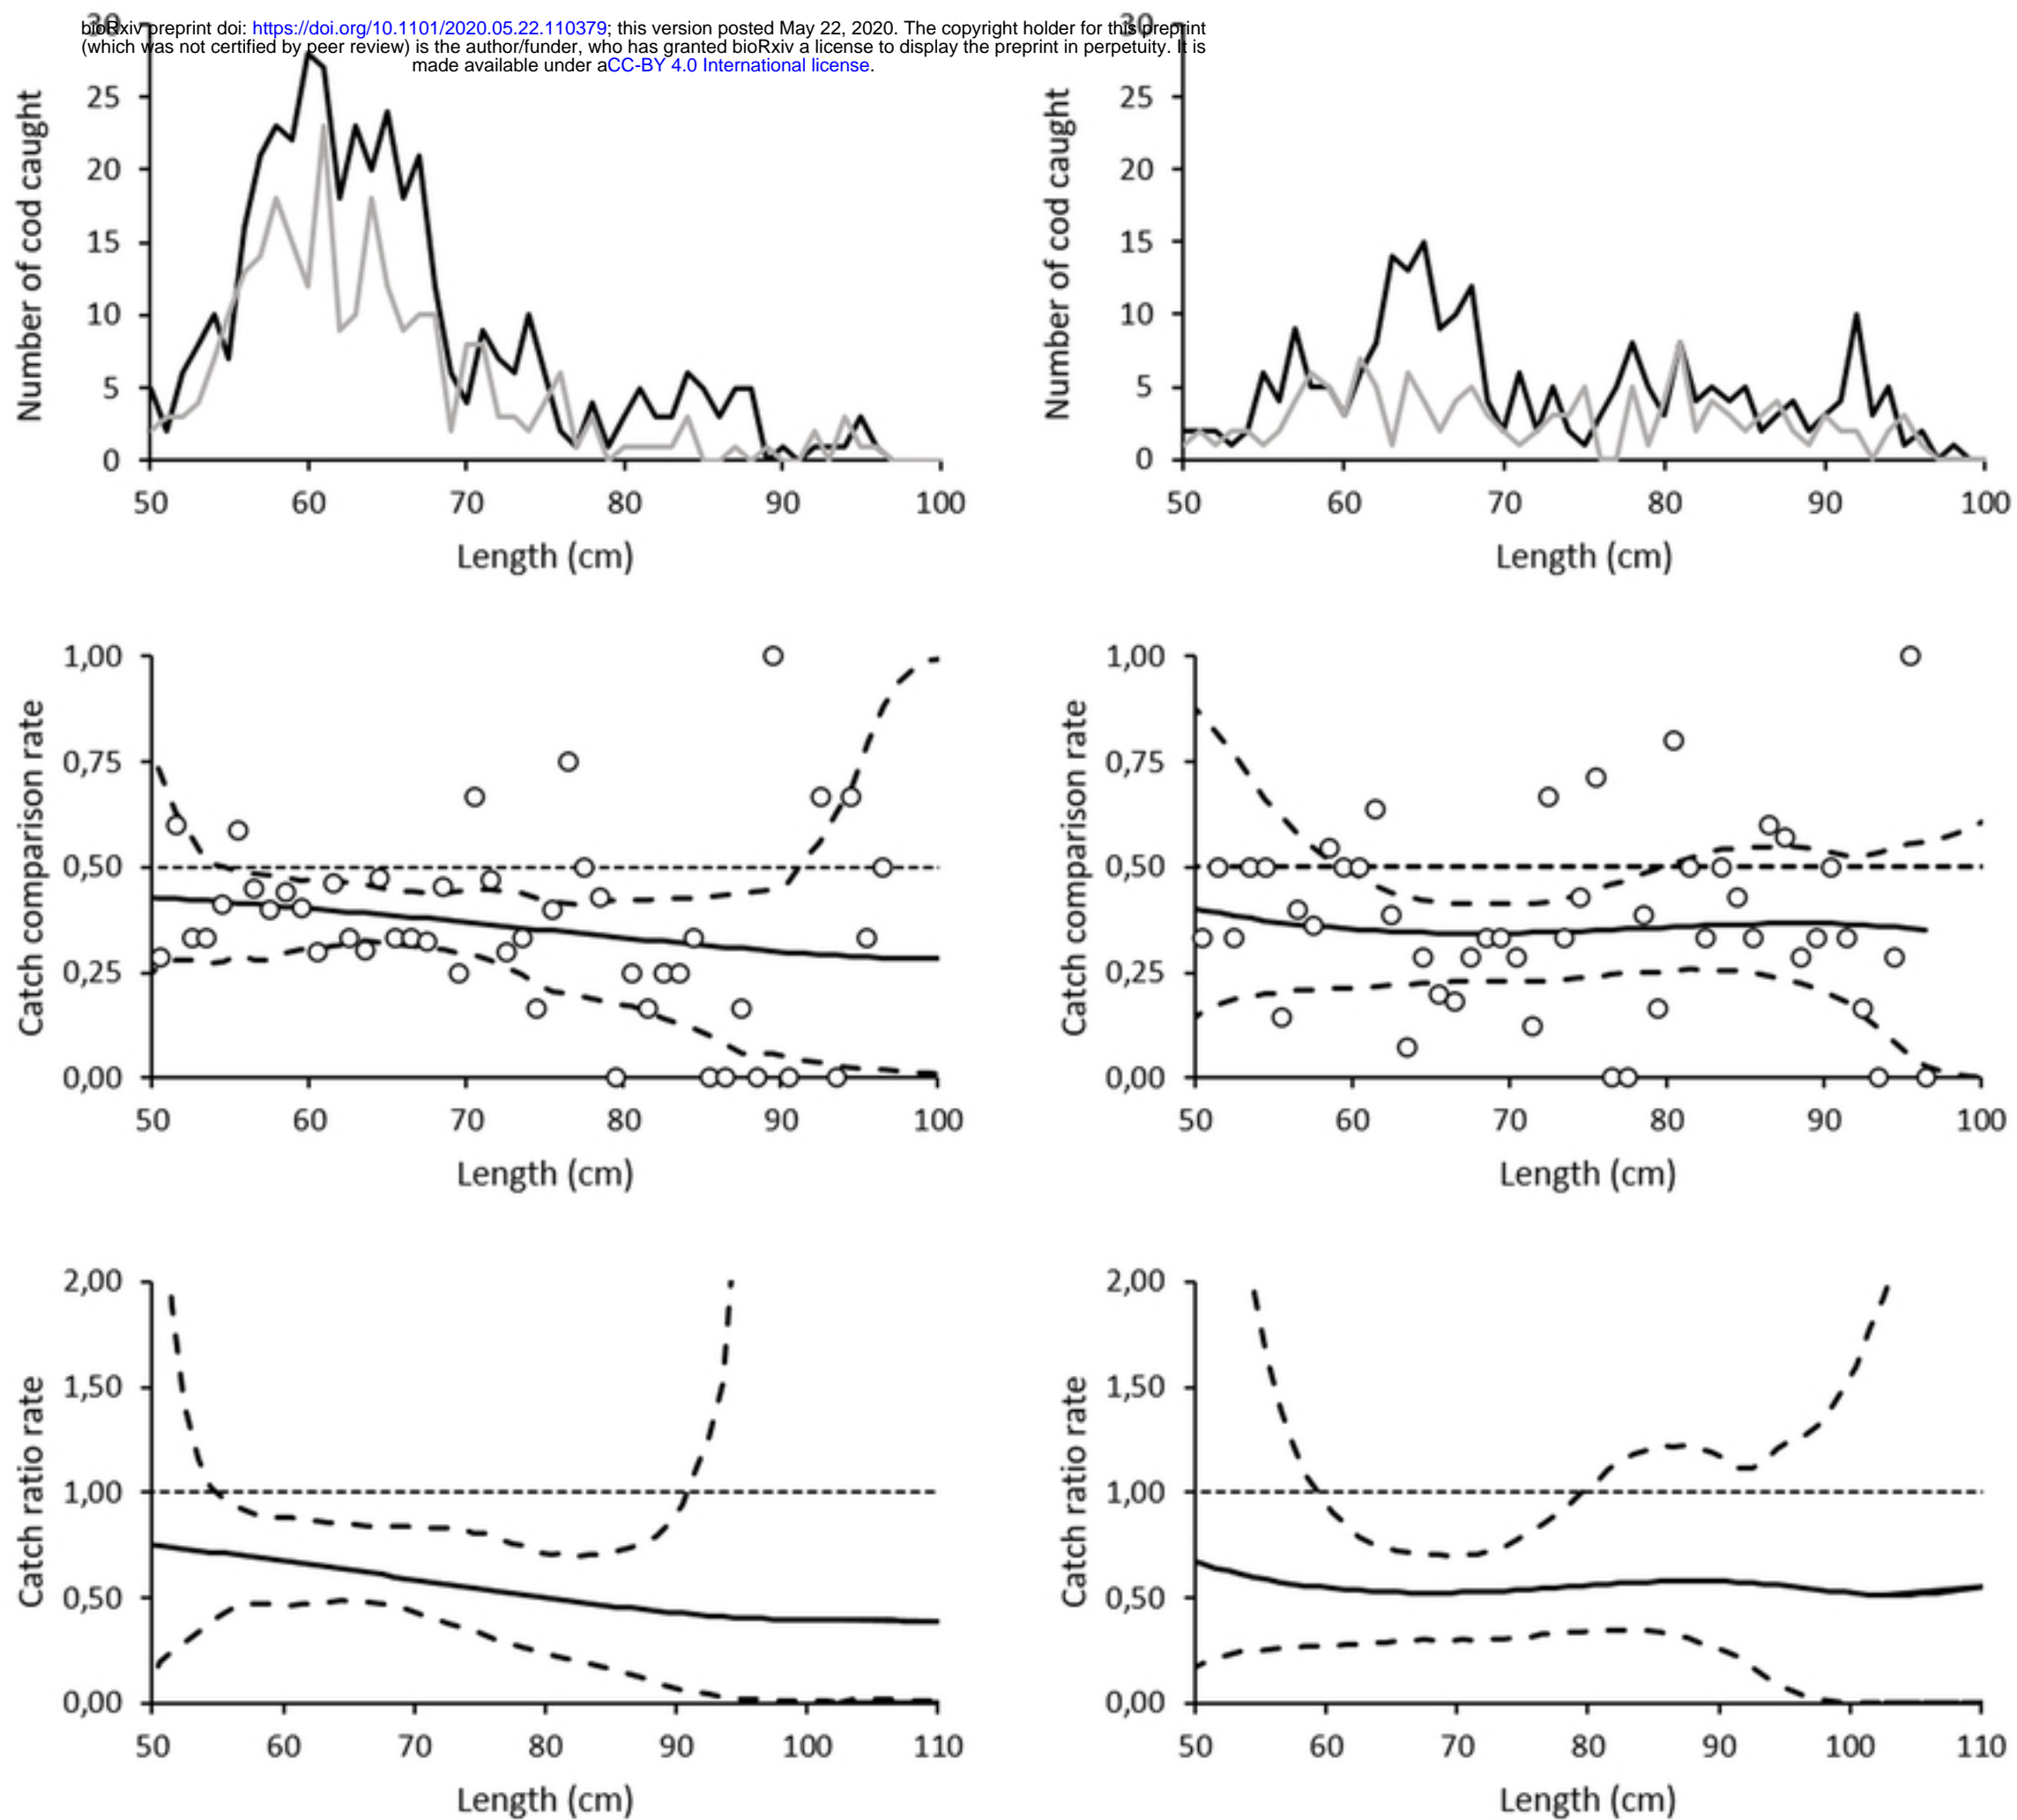

Figure 2

### Cod CR for bionet 60 vs 55

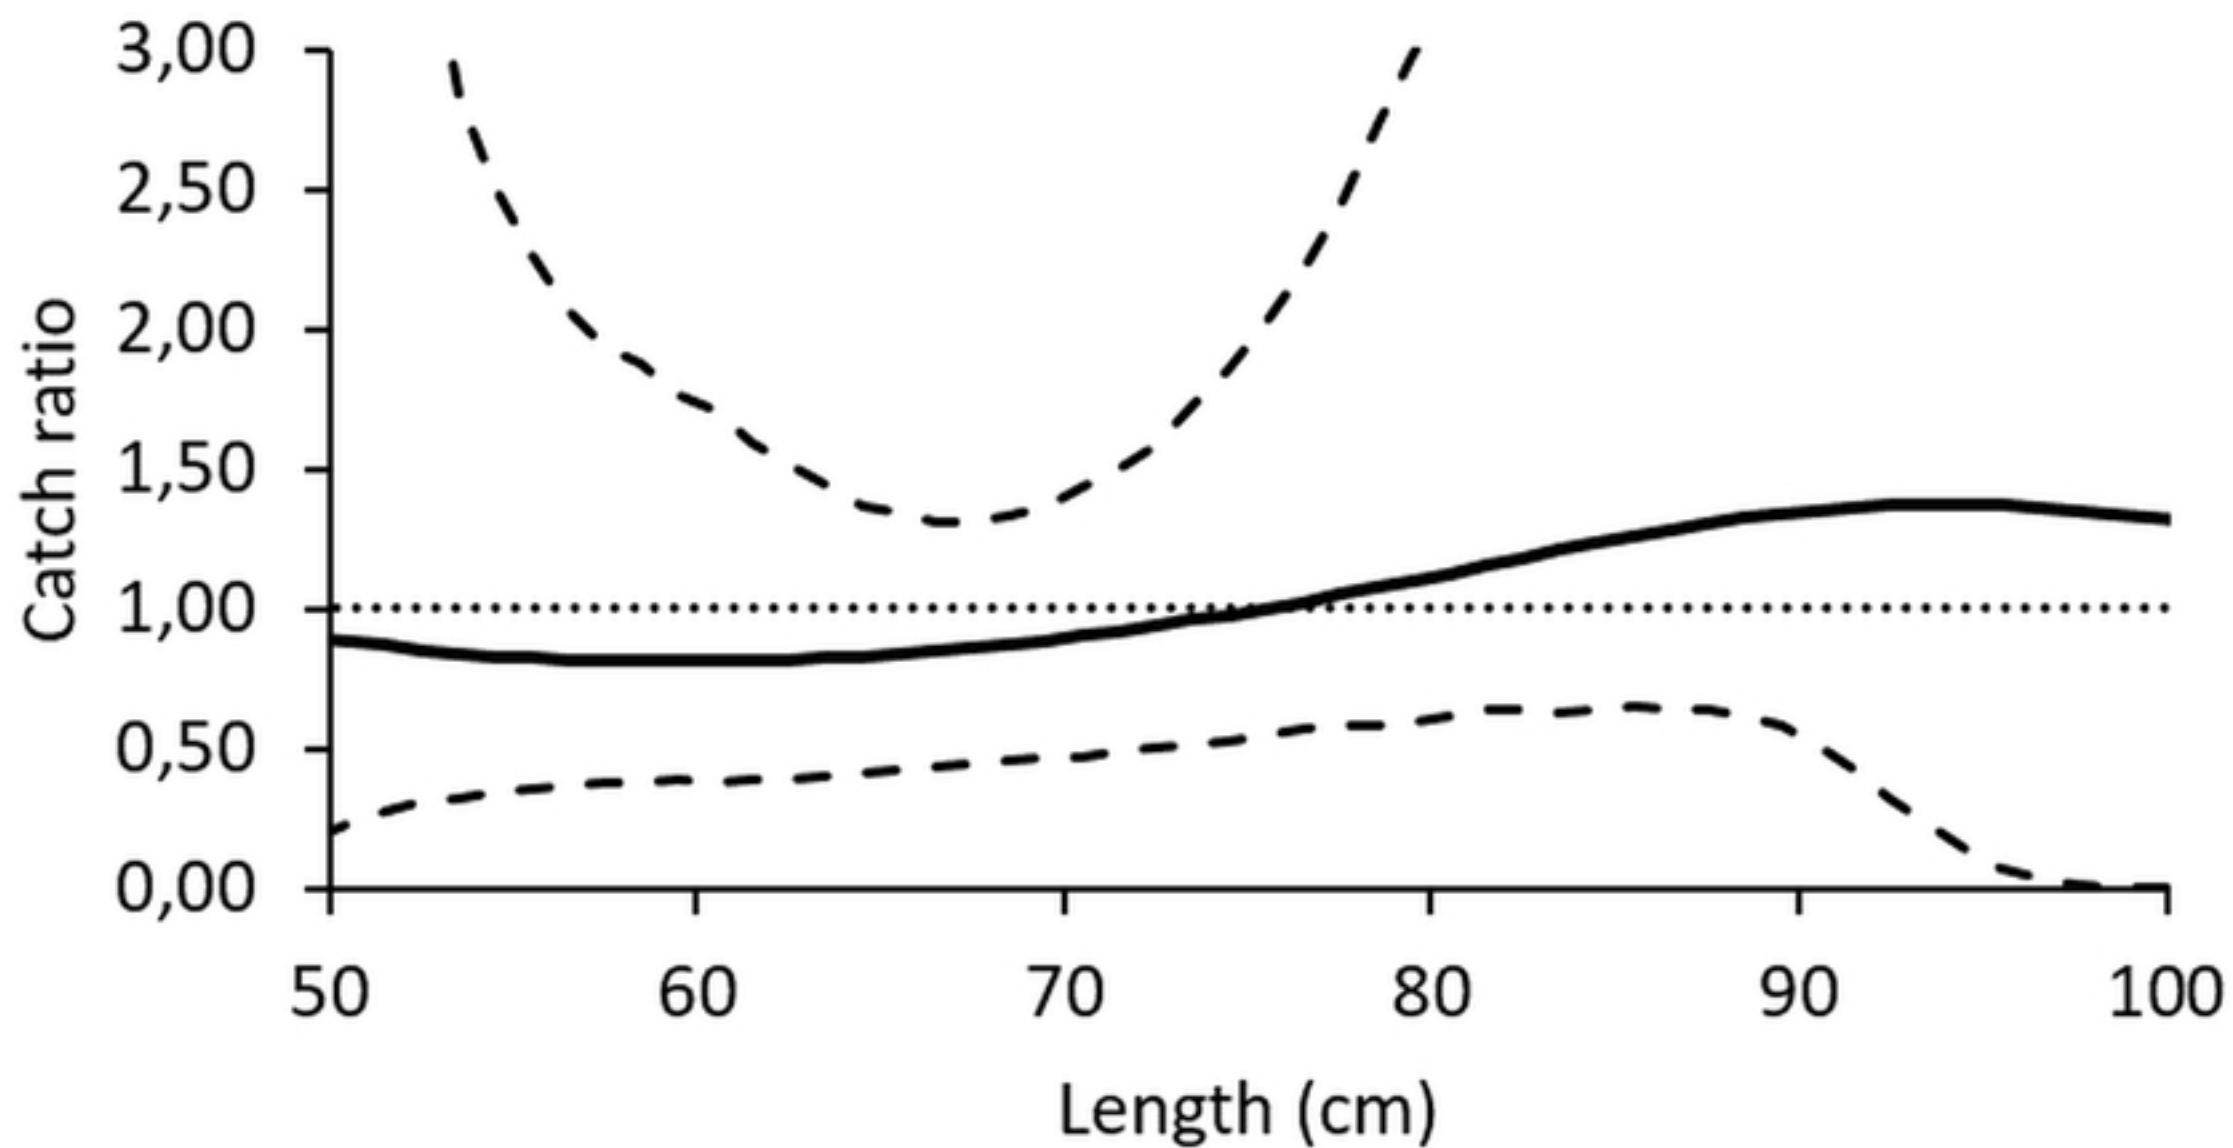

Figure 3



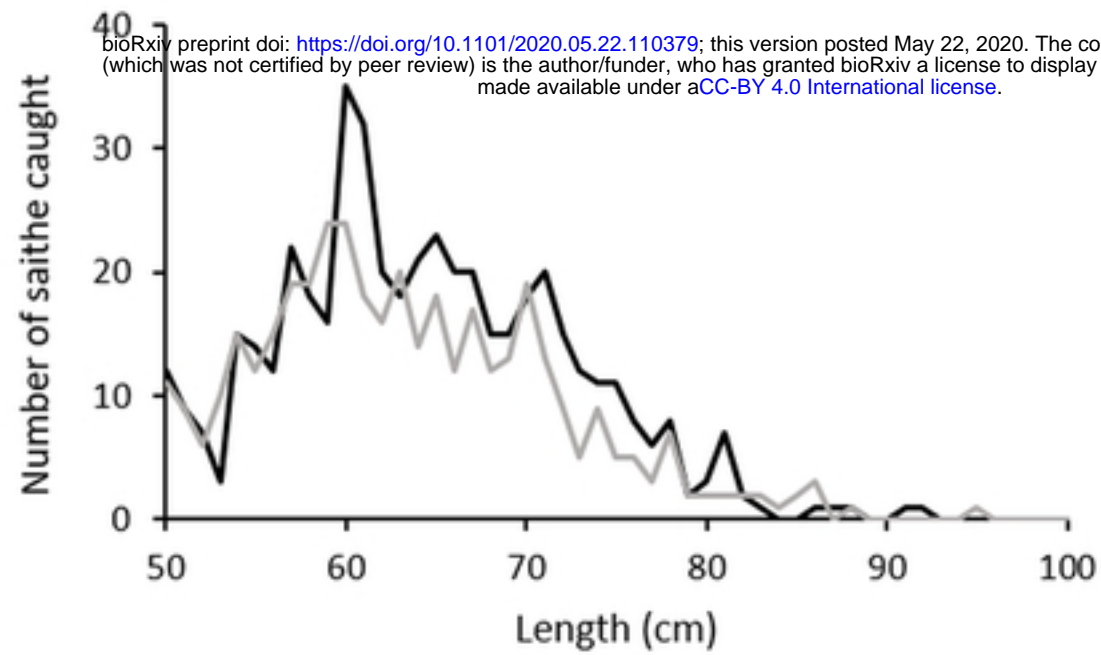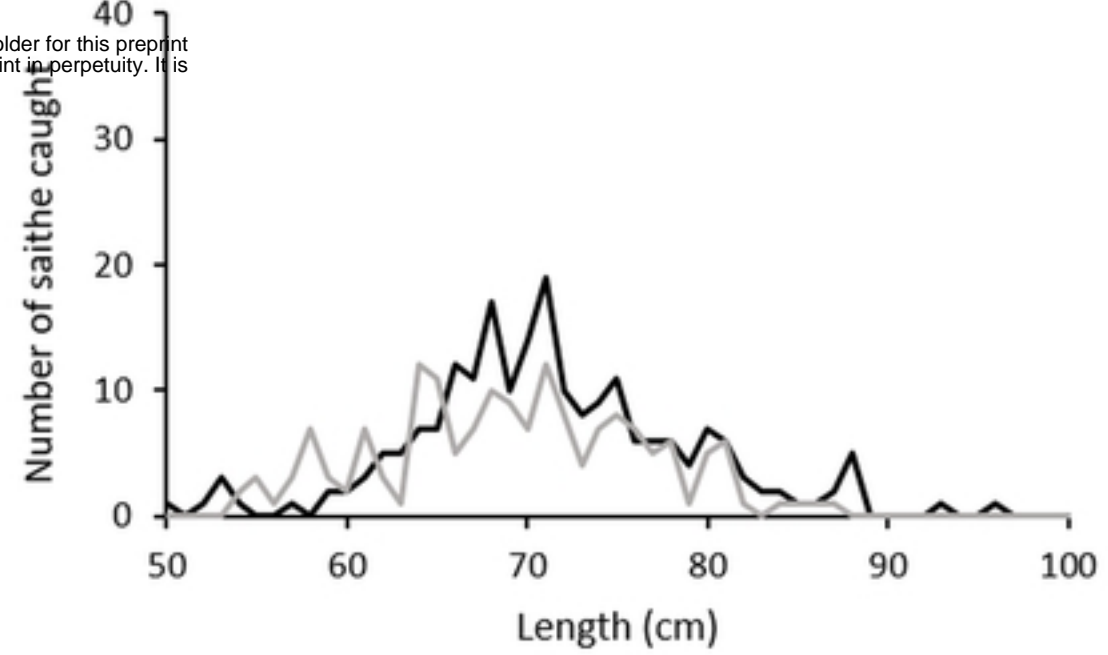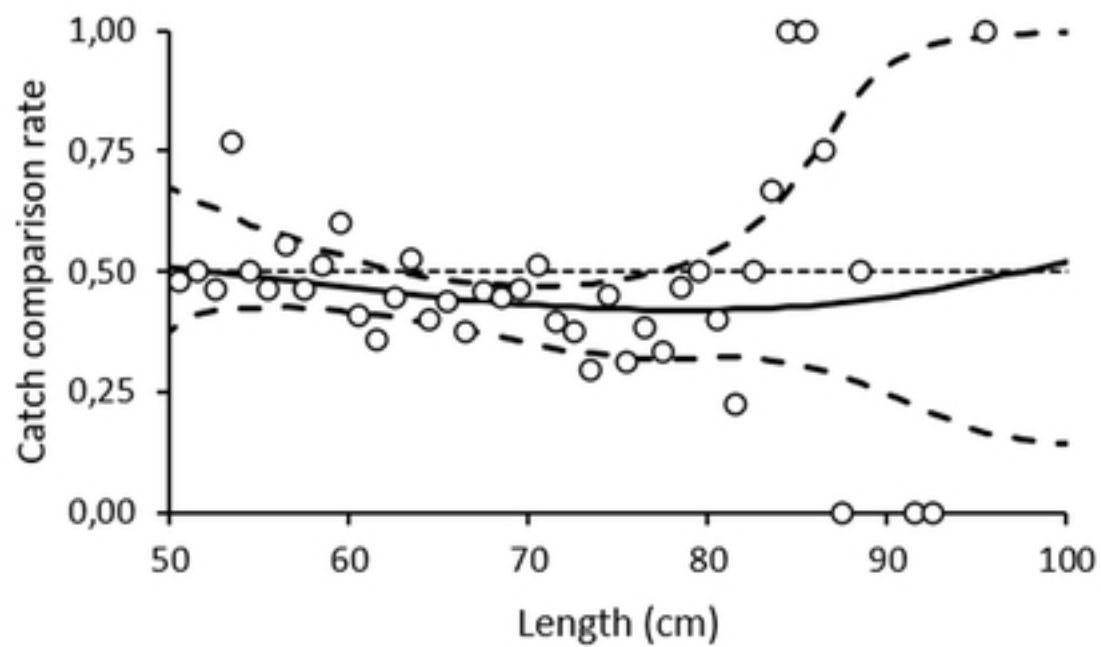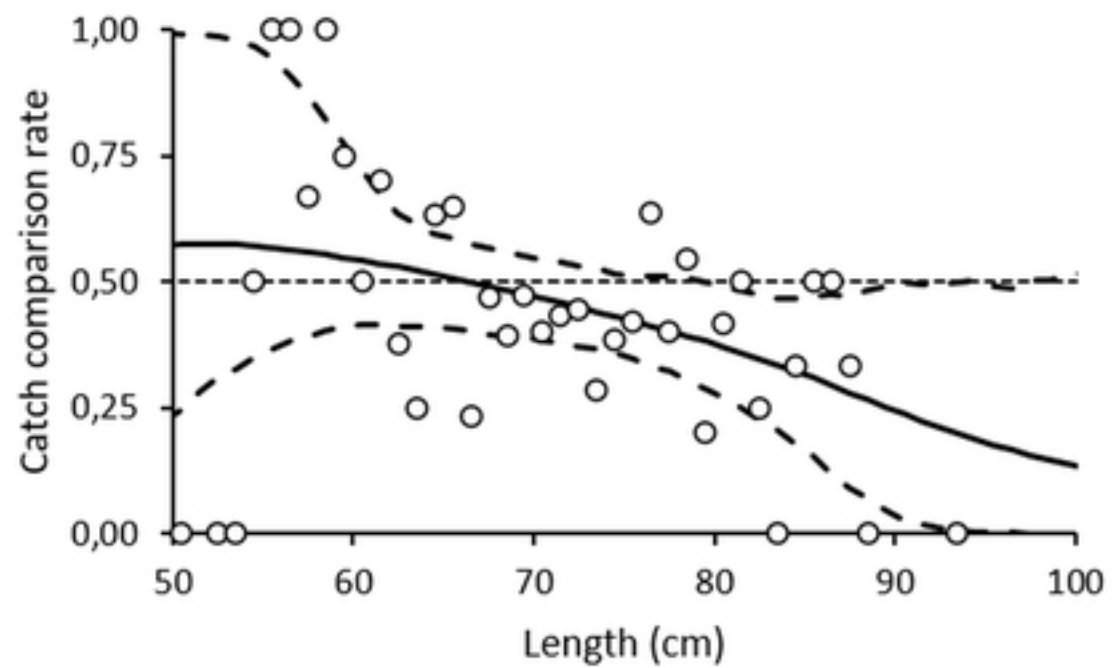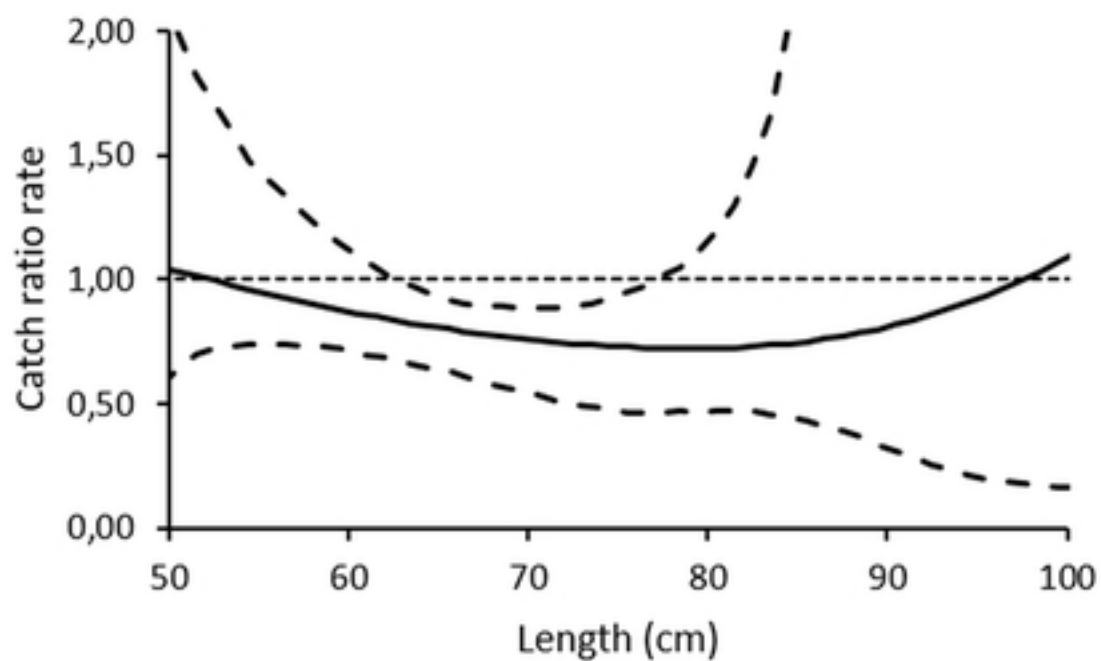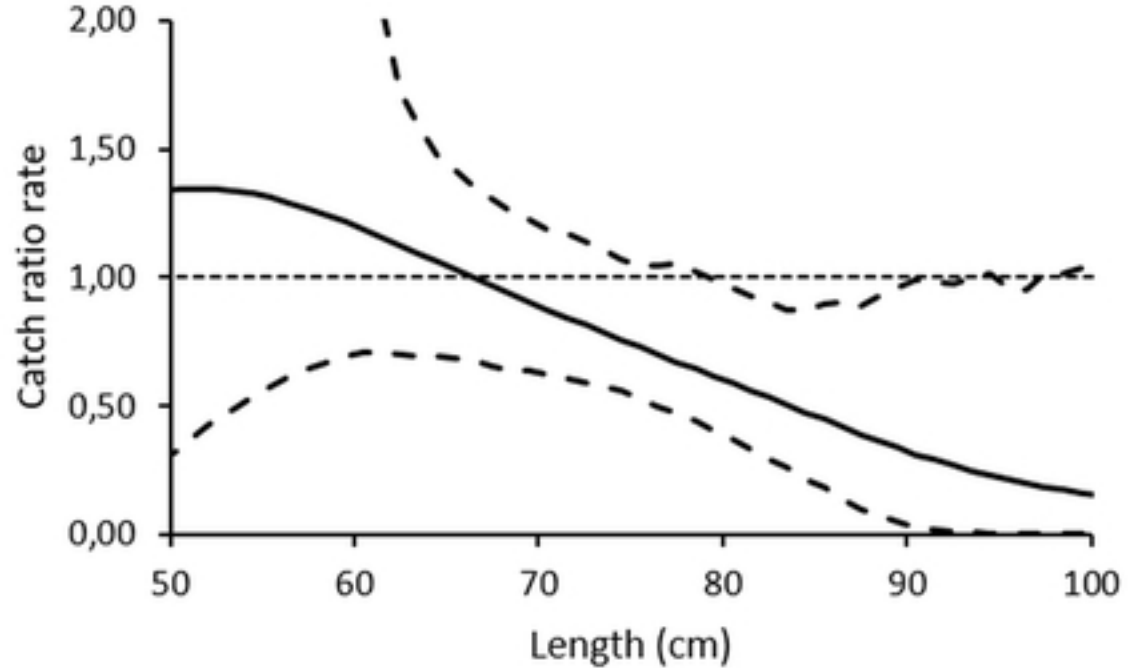

Figure 4

Saithe CR for bionet 60 vs 55

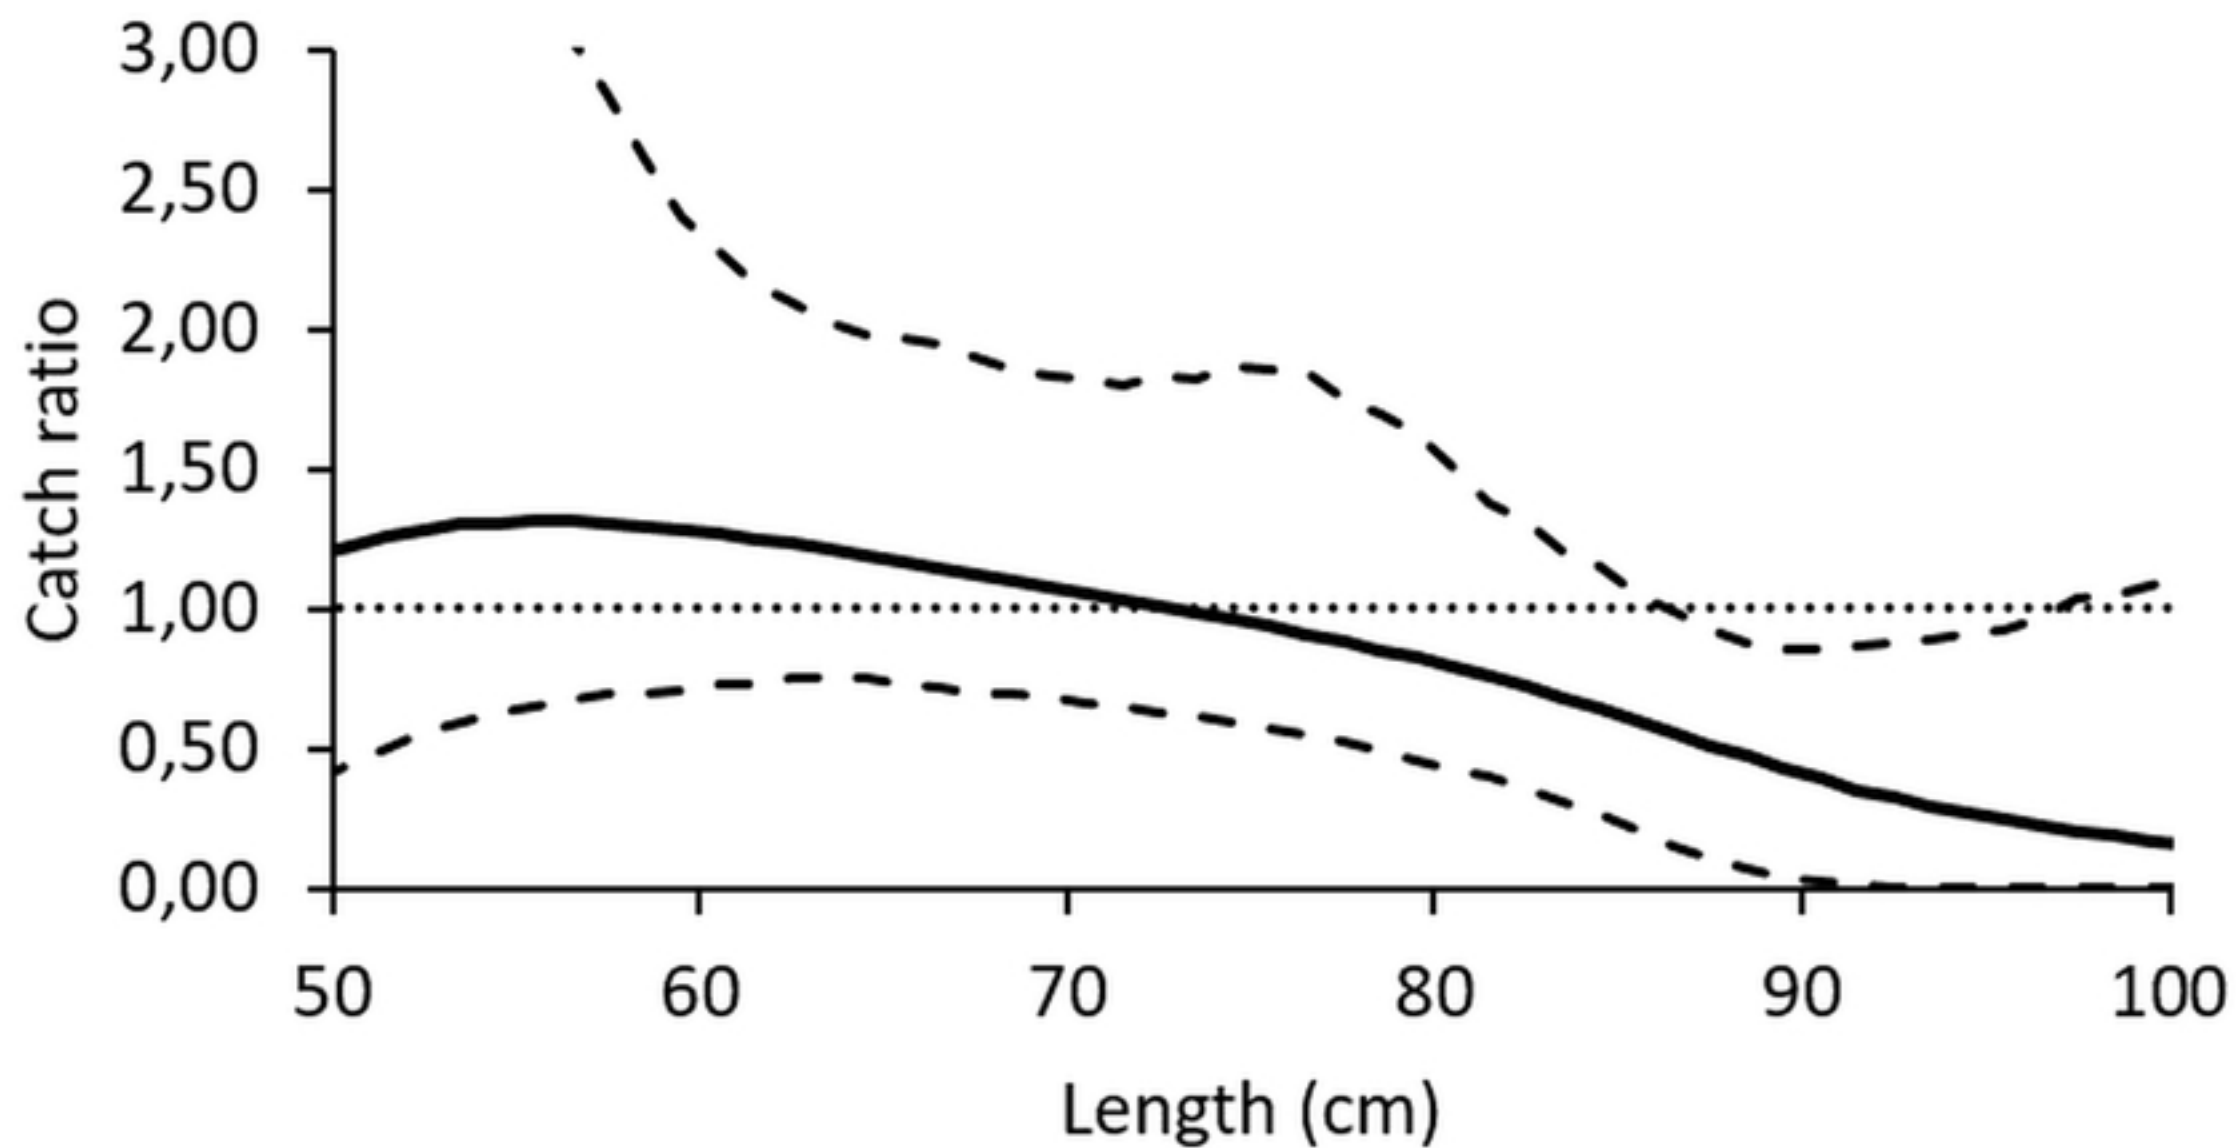

Figure 5

### New gillnets

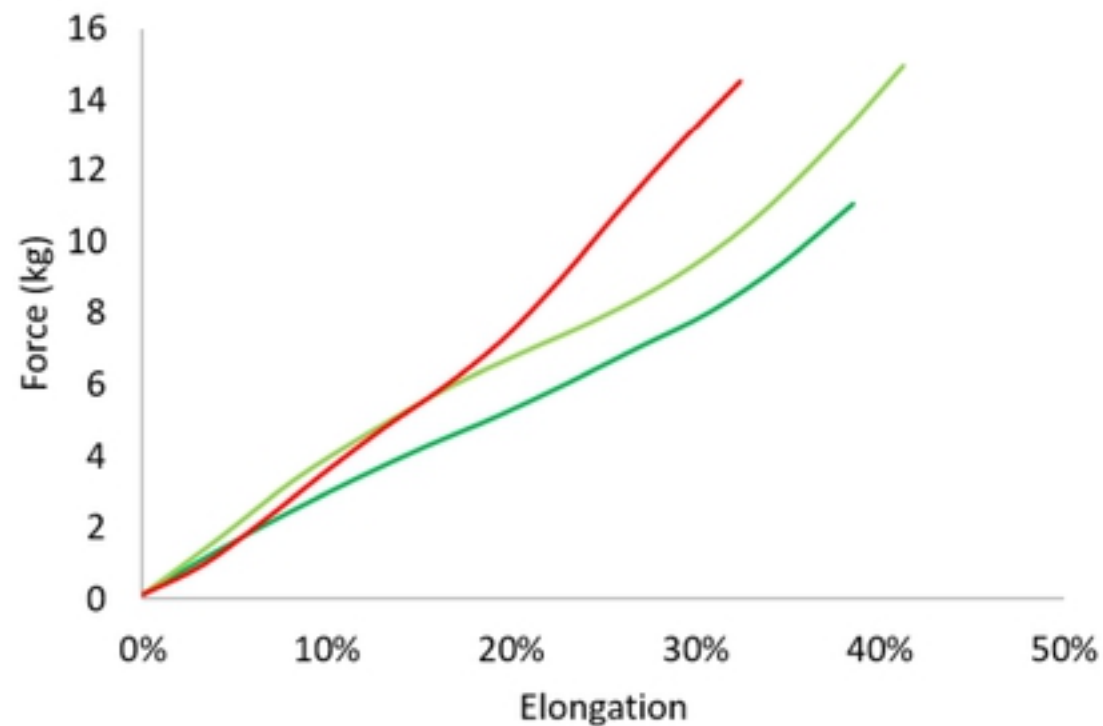

— Bionet 0.55mm — Bionet 0.60mm — Nylon net 0.55mm

### Used gillnets

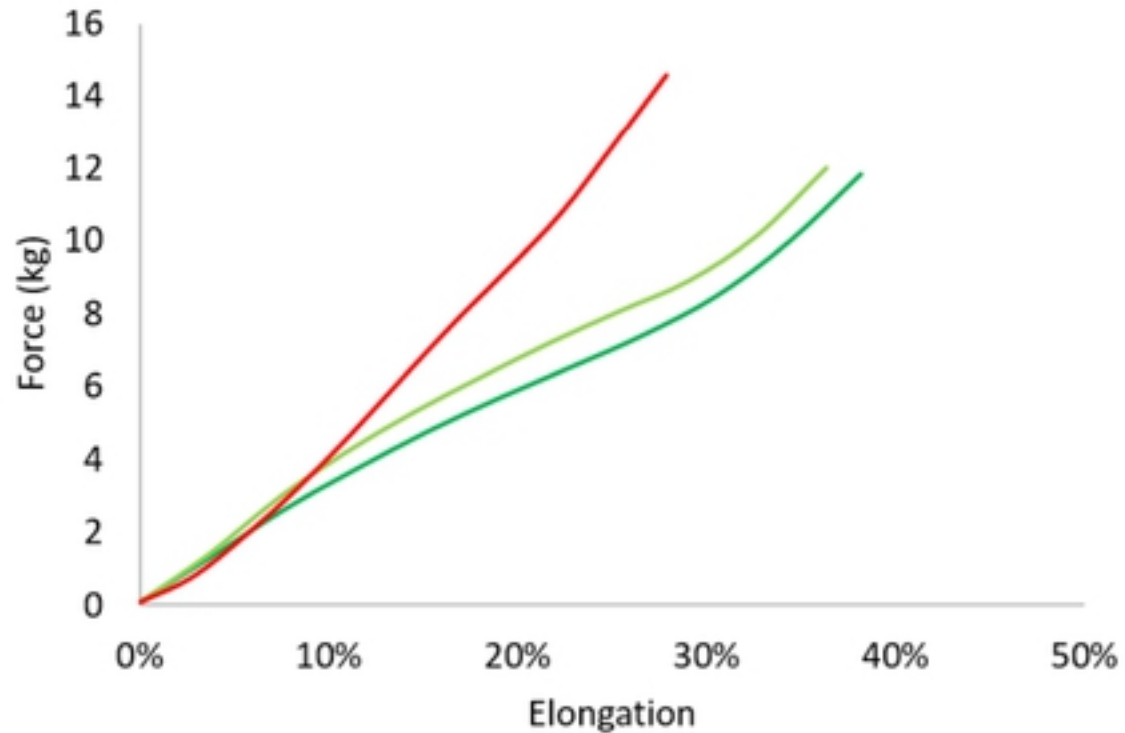

— Bionet 0.55mm — Bionet 0.60mm — Nylon net 0.55mm

# Figure 6

NEW gillnets

USED gillnets

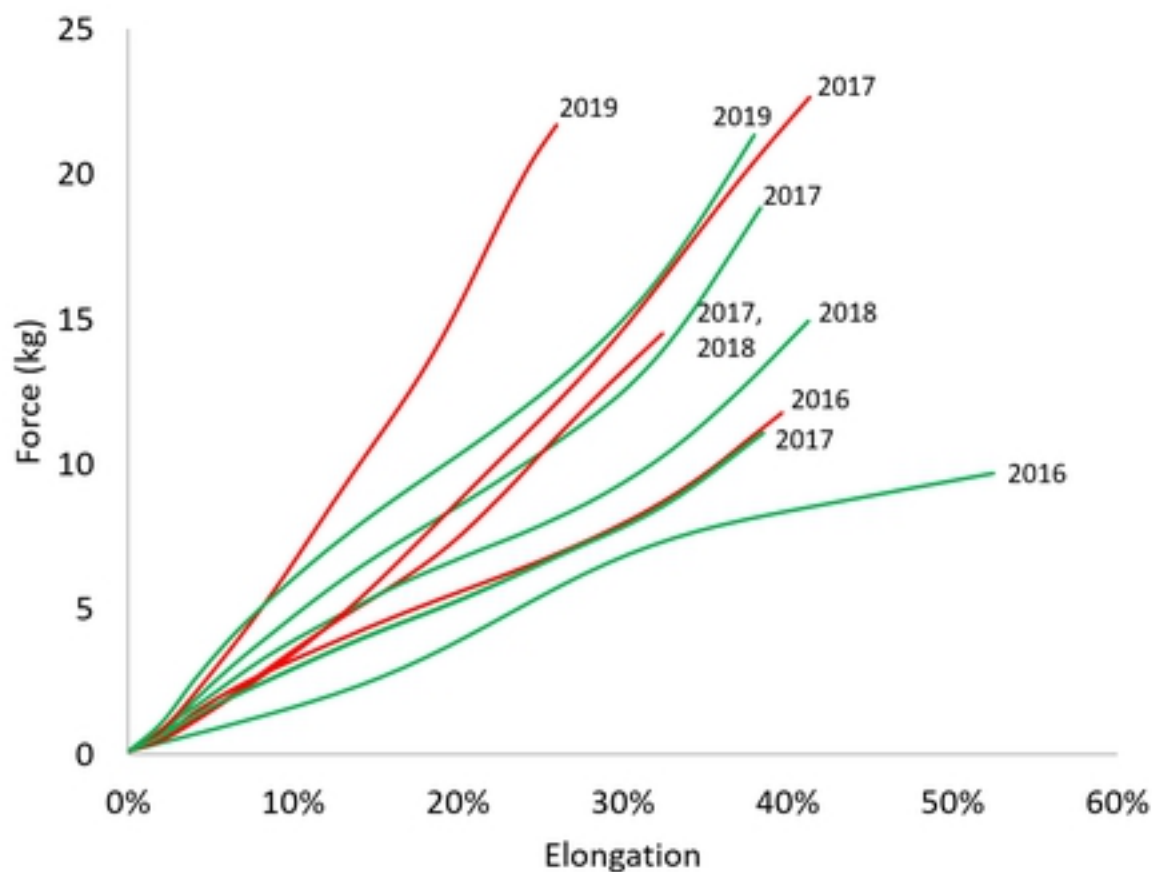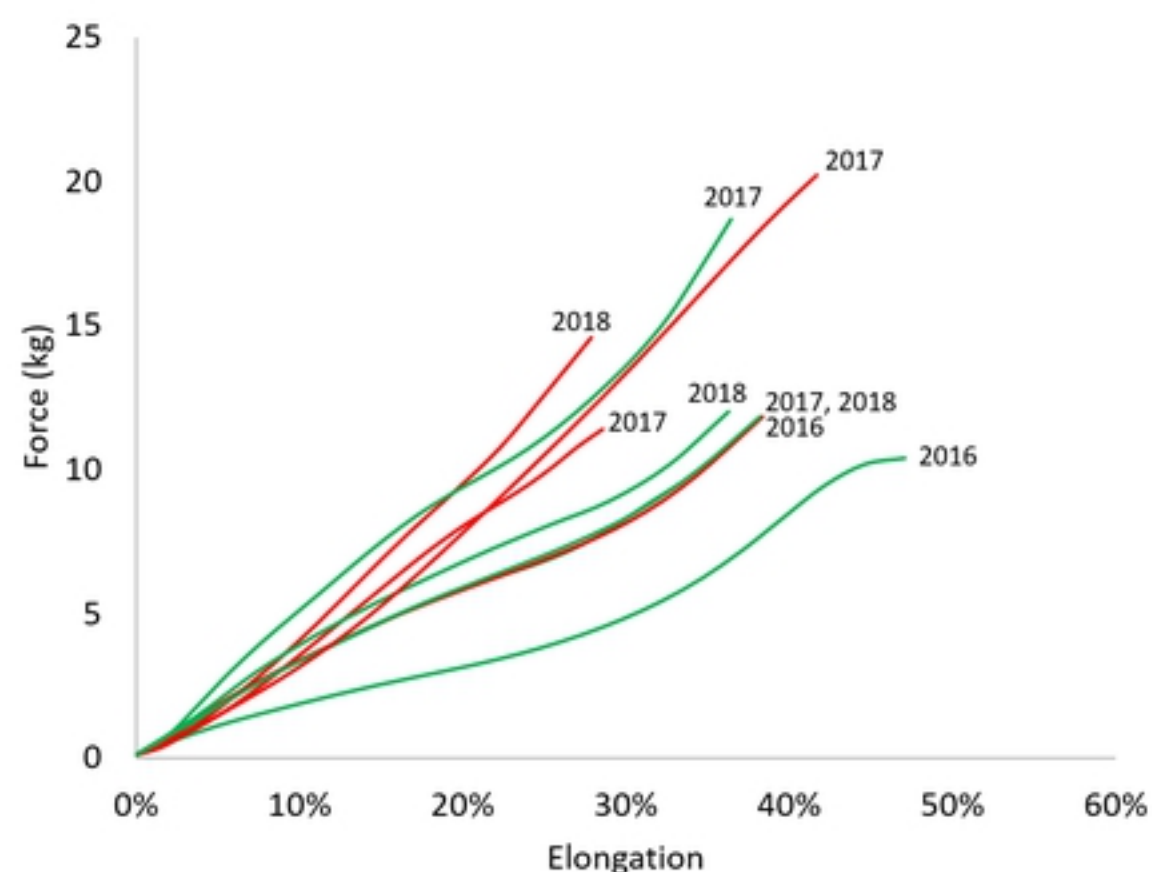

- 0.70mm Bionet (2017)
- 0.55mm Nylon PA (2016)
- 0.55mm Nylon PA (2018)
- 0.60mm Bionet (2018)
- 0.75mm Bionet (2019)
- 0.55mm Bionet (2017)
- 0.55mm Bionet (2016)
- 0.55mm Bionet (2018)
- 0.70mm Nylon PA (2019)
- 0.70mm Nylon PA (2017)

- 0.55mm Nylon PA (2017)
- 0.55mm Nylon PA (2016)
- 0.55mm Nylon PA (2018)
- 0.60mm Bionet (2018)
- 0.70mm Bionets (2017)
- 0.55mm Bionet (2017)
- 0.55mm Bionet (2016)
- 0.55mm Bionet (2018)
- 0.70mm Nylon PA (2017)

Figure 7
